# Supplementary material for: Systems Immunology Analysis Reveals an Immunomodulatory Effect of Snail-p53 Binding on Neutrophil- and T Cell-Mediated Immunity in KRAS Mutant Non-Small Cell Lung Cancer
Source: Front Immunol. 2020 Dec 14;11:569671. doi: 10.3389/fimmu.2020.569671 (PMC7768232; doi:10.3389/fimmu.2020.569671)
Supplement: Supplementary file 2 [file Table_2.xlsx]

## Sheet: Sheet1
Table S3. The raw aligned reads (non-filtered gene list) of vehicle treated A549 cells (NTC) and GN25 treated A549 cells (GN25)
Gene	Target	NTC	GN25	NCBI_NAME
SEC24B-AS1	AMPL37741840	12	4	SEC24B_antisense_RNA_1
A1BG	AMPL17425613	4	0	alpha-1-B_glycoprotein
A1CF	AMPL36593459	252	323	APOBEC1_complementation_factor
GGACT	AMPL17367653	15	3	gamma-glutamylamine_cyclotransferase
A2M	AMPL1384	0	0	alpha-2-macroglobulin
A2ML1	AMPL35942968	0	0	alpha-2-macroglobulin-like_1
A2MP1	AMPL37631703	0	0	alpha-2-macroglobulin_pseudogene_1
A4GALT	AMPL31888788	530	78	alpha_1_4-galactosyltransferase
A4GNT	AMPL32378916	0	0	alpha-1_4-N-acetylglucosaminyltransferase
AAAS	AMPL33679306	1663	861	achalasia__adrenocortical_insufficiency__alacrimia
AACS	AMPL36995895	568	446	acetoacetyl-CoA_synthetase
AADAC	AMPL5825582	486	183	arylacetamide_deacetylase
AADACL2	AMPL22311173	0	0	arylacetamide_deacetylase-like_2
AADACL3	AMPL4449457	0	0	arylacetamide_deacetylase-like_3
AADACL4	AMPL612401	0	0	arylacetamide_deacetylase-like_4
AADAT	AMPL32613953	274	281	aminoadipate_aminotransferase
AAGAB	AMPL14432082	2368	2462	alpha-_and_gamma-adaptin_binding_protein
AAK1	AMPL25904291	15	25	AP2_associated_kinase_1
AAMP	AMPL3466806	1216	711	angio-associated__migratory_cell_protein
AANAT	AMPL3275619	0	0	aralkylamine_N-acetyltransferase
AARS	AMPL10784042	4081	3201	alanyl-tRNA_synthetase
AARS2	AMPL31469233	156	50	alanyl-tRNA_synthetase_2__mitochondrial
PTGES3L-AARSD1	AMPL4663429	5	8	PTGES3L-AARSD1_readthrough
AASDH	AMPL21447136	43	72	aminoadipate-semialdehyde_dehydrogenase
AASDHPPT	AMPL25092600	818	944	aminoadipate-semialdehyde_dehydrogenase-phosphopantetheinyl_transferase
AASS	AMPL29326360	2	0	aminoadipate-semialdehyde_synthase
AATF	AMPL12558335	5584	9510	apoptosis_antagonizing_transcription_factor
AATK	AMPL5542914	4	2	apoptosis-associated_tyrosine_kinase
ABAT	AMPL33853761	64	29	4-aminobutyrate_aminotransferase
ABCA1	AMPL28385508	307	108	ATP-binding_cassette__sub-family_A__ABC1__member_1
ABCA10	AMPL18549579	3	3	ATP-binding_cassette__sub-family_A__ABC1__member_10
ABCA12	AMPL15858282	74	96	ATP-binding_cassette__sub-family_A__ABC1__member_12
ABCA13	AMPL34481782	0	0	ATP-binding_cassette__sub-family_A__ABC1__member_13
ABCA17P	AMPL19877459	0	0	ATP-binding_cassette__sub-family_A__ABC1__member_17__pseudogene
ABCA2	AMPL8099046	831	356	ATP-binding_cassette__sub-family_A__ABC1__member_2
ABCA3	AMPL5076273	818	430	ATP-binding_cassette__sub-family_A__ABC1__member_3
ABCA4	AMPL3661170	0	0	ATP-binding_cassette__sub-family_A__ABC1__member_4
ABCA5	AMPL16435662	246	237	ATP-binding_cassette__sub-family_A__ABC1__member_5
ABCA6	AMPL18550501	0	1	ATP-binding_cassette__sub-family_A__ABC1__member_6
ABCA7	AMPL31288152	34	2	ATP-binding_cassette__sub-family_A__ABC1__member_7
ABCA8	AMPL13251723	0	1	ATP-binding_cassette__sub-family_A__ABC1__member_8
ABCA9	AMPL15770940	0	0	ATP-binding_cassette__sub-family_A__ABC1__member_9
ABCB1	AMPL5599607	8	13	ATP-binding_cassette__sub-family_B__MDR_TAP__member_1
ABCB10	AMPL12686552	765	624	ATP-binding_cassette__sub-family_B__MDR_TAP__member_10
ABCB11	AMPL7530015	1	2	ATP-binding_cassette__sub-family_B__MDR_TAP__member_11
ABCB4	AMPL5513474	2	0	ATP-binding_cassette__sub-family_B__MDR_TAP__member_4
ABCB5	AMPL6715085	0	0	ATP-binding_cassette__sub-family_B__MDR_TAP__member_5
ABCB6	AMPL29447135	1117	436	ATP-binding_cassette__sub-family_B__MDR_TAP__member_6
ABCB7	AMPL28554255	1062	692	ATP-binding_cassette__sub-family_B__MDR_TAP__member_7
ABCB8	AMPL12342162	146	48	ATP-binding_cassette__sub-family_B__MDR_TAP__member_8
ABCB9	AMPL30785555	3	1	ATP-binding_cassette__sub-family_B__MDR_TAP__member_9
ABCC1	AMPL28603395	3498	1389	ATP-binding_cassette__sub-family_C__CFTR_MRP__member_1
ABCC10	AMPL7136100	174	84	ATP-binding_cassette__sub-family_C__CFTR_MRP__member_10
ABCC11	AMPL16427617	1	1	ATP-binding_cassette__sub-family_C__CFTR_MRP__member_11
ABCC12	AMPL16211125	0	0	ATP-binding_cassette__sub-family_C__CFTR_MRP__member_12
ABCC2	AMPL3093849	5344	3939	ATP-binding_cassette__sub-family_C__CFTR_MRP__member_2
ABCC3	AMPL11367250	2801	836	ATP-binding_cassette__sub-family_C__CFTR_MRP__member_3
ABCC4	AMPL27233725	1318	670	ATP-binding_cassette__sub-family_C__CFTR_MRP__member_4
ABCC5	AMPL28800826	205	184	ATP-binding_cassette__sub-family_C__CFTR_MRP__member_5
ABCC6	AMPL9526889	29	2	ATP-binding_cassette__sub-family_C__CFTR_MRP__member_6
ABCC8	AMPL1955595	32	6	ATP-binding_cassette__sub-family_C__CFTR_MRP__member_8
ABCC9	AMPL31159527	0	0	ATP-binding_cassette__sub-family_C__CFTR_MRP__member_9
ABCD1	AMPL4354534	171	65	ATP-binding_cassette__sub-family_D__ALD__member_1
ABCD2	AMPL30300100	0	0	ATP-binding_cassette__sub-family_D__ALD__member_2
ABCD3	AMPL10799498	1072	992	ATP-binding_cassette__sub-family_D__ALD__member_3
ABCD4	AMPL28234371	420	218	ATP-binding_cassette__sub-family_D__ALD__member_4
ABCE1	AMPL8835806	3433	3696	ATP-binding_cassette__sub-family_E__OABP__member_1
ABCF1	AMPL1062180	1079	1011	ATP-binding_cassette__sub-family_F__GCN20__member_1
ABCF2	AMPL28710948	2087	2521	ATP-binding_cassette__sub-family_F__GCN20__member_2
ABCF3	AMPL33247607	610	281	ATP-binding_cassette__sub-family_F__GCN20__member_3
ABCG1	AMPL29470197	12	2	ATP-binding_cassette__sub-family_G__WHITE__member_1
ABCG2	AMPL28876904	1497	1098	ATP-binding_cassette__sub-family_G__WHITE__member_2
ABCG4	AMPL35962683	9	3	ATP-binding_cassette__sub-family_G__WHITE__member_4
ABCG5	AMPL37320861	0	0	ATP-binding_cassette__sub-family_G__WHITE__member_5
ABCG8	AMPL37439385	0	0	ATP-binding_cassette__sub-family_G__WHITE__member_8
ABHD1	AMPL16990403	33	9	abhydrolase_domain_containing_1
ABHD10	AMPL34005486	311	212	abhydrolase_domain_containing_10
ABHD11	AMPL35722665	233	150	abhydrolase_domain_containing_11
ABHD12	AMPL32297518	1808	1494	abhydrolase_domain_containing_12
ABHD12B	AMPL7873511	0	0	abhydrolase_domain_containing_12B
ABHD13	AMPL16027178	52	24	abhydrolase_domain_containing_13
ABHD14A	AMPL25862037	146	86	abhydrolase_domain_containing_14A
ABHD14B	AMPL6719779	1322	378	abhydrolase_domain_containing_14B
ABHD15	AMPL20585213	860	367	abhydrolase_domain_containing_15
ABHD16A	AMPL36420922	500	232	abhydrolase_domain_containing_16A
ABHD16B	AMPL17532477	40	1	abhydrolase_domain_containing_16B
ABHD2	AMPL17078991	3368	1551	abhydrolase_domain_containing_2
ABHD3	AMPL17297898	428	319	abhydrolase_domain_containing_3
ABHD4	AMPL37127761	1172	645	abhydrolase_domain_containing_4
ABHD5	AMPL33305114	249	323	abhydrolase_domain_containing_5
ABHD6	AMPL32219778	264	228	abhydrolase_domain_containing_6
ABHD8	AMPL37207261	171	68	abhydrolase_domain_containing_8
ABI1	AMPL983412	3288	1635	abl-interactor_1
ABI2	AMPL27003455	684	417	abl-interactor_2
ABI3	AMPL32495296	2	0	ABI_family__member_3
ABI3BP	AMPL25539060	8	8	ABI_family__member_3__NESH__binding_protein
ABL1	AMPL28966626	2357	1366	c-abl_oncogene_1__non-receptor_tyrosine_kinase
ABL2	AMPL27388698	865	883	c-abl_oncogene_2__non-receptor_tyrosine_kinase
ABLIM1	AMPL8365011	365	222	actin_binding_LIM_protein_1
ABLIM2	AMPL2772997	0	0	actin_binding_LIM_protein_family__member_2
ABLIM3	AMPL26412001	29	17	actin_binding_LIM_protein_family__member_3
ABO	AMPL31007531	0	0	ABO_blood_group__transferase_A__alpha_1-3-N-acetylgalactosaminyltransferase__transferase_B__alpha_1-3-galactosyltransferase
ABP1	AMPL2573026	1	0	.
ABR	AMPL36685851	21	6	active_BCR-related
ABRA	AMPL34219580	0	0	actin-binding_Rho_activating_protein
ABT1	AMPL13223807	385	272	activator_of_basal_transcription_1
ABTB1	AMPL16445718	922	233	ankyrin_repeat_and_BTB__POZ__domain_containing_1
ABTB2	AMPL34779187	538	295	ankyrin_repeat_and_BTB__POZ__domain_containing_2
ACAA1	AMPL9520710	627	368	acetyl-CoA_acyltransferase_1
ACAA2	AMPL27900686	1486	1428	acetyl-CoA_acyltransferase_2
ACACA	AMPL22279197	1137	986	acetyl-CoA_carboxylase_alpha
ACACB	AMPL4793463	227	94	acetyl-CoA_carboxylase_beta
ACAD10	AMPL1491619	407	145	acyl-CoA_dehydrogenase_family__member_10
ACAD8	AMPL25426669	430	239	acyl-CoA_dehydrogenase_family__member_8
ACAD9	AMPL24496230	370	289	acyl-CoA_dehydrogenase_family__member_9
ACADL	AMPL7739345	3	2	acyl-CoA_dehydrogenase__long_chain
ACADM	AMPL1584268	193	293	acyl-CoA_dehydrogenase__C-4_to_C-12_straight_chain
ACADS	AMPL7825	276	104	acyl-CoA_dehydrogenase__C-2_to_C-3_short_chain
ACADSB	AMPL7222152	387	173	acyl-CoA_dehydrogenase__short_branched_chain
ACADVL	AMPL10181	1576	1209	acyl-CoA_dehydrogenase__very_long_chain
ACAN	AMPL12103662	0	0	aggrecan
ACAP1	AMPL24152985	47	8	ArfGAP_with_coiled-coil__ankyrin_repeat_and_PH_domains_1
ACAP2	AMPL13640857	468	282	ArfGAP_with_coiled-coil__ankyrin_repeat_and_PH_domains_2
ACAP3	AMPL13987354	95	61	ArfGAP_with_coiled-coil__ankyrin_repeat_and_PH_domains_3
ACAT1	AMPL12118	1153	1165	acetyl-CoA_acetyltransferase_1
ACAT2	AMPL26878106	543	471	acetyl-CoA_acetyltransferase_2
ACBD3	AMPL37003194	849	483	acyl-CoA_binding_domain_containing_3
ACBD4	AMPL4357019	798	199	acyl-CoA_binding_domain_containing_4
ACBD5	AMPL36270060	1196	754	acyl-CoA_binding_domain_containing_5
ACBD6	AMPL15181913	735	1128	acyl-CoA_binding_domain_containing_6
ACBD7	AMPL5908011	105	44	acyl-CoA_binding_domain_containing_7
ASIC2	AMPL2568680	14	9	acid-sensing__proton-gated__ion_channel_2
ASIC1	AMPL31611909	232	86	acid-sensing__proton-gated__ion_channel_1
ASIC3	AMPL30664287	197	38	acid-sensing__proton-gated__ion_channel_3
ASIC5	AMPL31114683	0	0	,acid-sensing__proton-gated__ion_channel_family_member_5
ACCS	AMPL2394683	77	33	1-aminocyclopropane-1-carboxylate_synthase_homolog__Arabidopsis__non-functional
ACCSL	AMPL288585	0	0	1-aminocyclopropane-1-carboxylate_synthase_homolog__Arabidopsis__non-functional_-like
ACD	AMPL5993884	302	155	adrenocortical_dysplasia_homolog__mouse
ACE	AMPL3025819	7	1	angiotensin_I_converting_enzyme
ACE2	AMPL35536452	1	0	angiotensin_I_converting_enzyme_2
ACER1	AMPL17211398	0	0	alkaline_ceramidase_1
ACER2	AMPL1493437	139	221	alkaline_ceramidase_2
ACER3	AMPL32851651	304	464	alkaline_ceramidase_3
ACHE	AMPL33186225	5	1	acetylcholinesterase__Yt_blood_group
ACIN1	AMPL24295956	938	423	apoptotic_chromatin_condensation_inducer_1
ACLY	AMPL1076044	13243	7999	ATP_citrate_lyase
ACMSD	AMPL17496093	0	0	aminocarboxymuconate_semialdehyde_decarboxylase
ACN9	AMPL30778507	908	659	ACN9_homolog__S._cerevisiae
ACO1	AMPL8041086	1228	839	aconitase_1__soluble
ACO2	AMPL5067366	1548	774	aconitase_2__mitochondrial
ACOT11	AMPL36466747	70	26	acyl-CoA_thioesterase_11
ACOT12	AMPL16275627	0	0	acyl-CoA_thioesterase_12
ACOT13	AMPL31536489	1857	926	acyl-CoA_thioesterase_13
ACOT2	AMPL13144765	408	307	acyl-CoA_thioesterase_2
ACOT4	AMPL35719990	4	7	acyl-CoA_thioesterase_4
ACOT6	AMPL5780307	0	0	acyl-CoA_thioesterase_6
ACOT7	AMPL21011666	678	453	acyl-CoA_thioesterase_7
ACOT8	AMPL29351247	333	108	acyl-CoA_thioesterase_8
ACOT9	AMPL4319307	1484	1285	acyl-CoA_thioesterase_9
ACOX1	AMPL29431396	1110	1039	acyl-CoA_oxidase_1__palmitoyl
ACOX2	AMPL10092891	11	2	acyl-CoA_oxidase_2__branched_chain
ACOX3	AMPL7109428	176	74	acyl-CoA_oxidase_3__pristanoyl
ACOXL	AMPL3056205	0	0	acyl-CoA_oxidase-like
ACP1	AMPL29290989	4823	3414	acid_phosphatase_1__soluble
ACP2	AMPL8290283	299	140	acid_phosphatase_2__lysosomal
ACP5	AMPL5351157	4	1	acid_phosphatase_5__tartrate_resistant
ACP6	AMPL31246233	459	238	acid_phosphatase_6__lysophosphatidic
ACPL2	AMPL3096230	503	418	acid_phosphatase-like_2
ACPP	AMPL5134608	6	2	acid_phosphatase__prostate
ACPT	AMPL16220565	0	0	acid_phosphatase__testicular
ACR	AMPL3268429	10	1	acrosin
ACRBP	AMPL14383873	16	2	acrosin_binding_protein
ACRC	AMPL18692381	16	2	acidic_repeat_containing
ACRV1	AMPL8961356	0	0	acrosomal_vesicle_protein_1
ACSBG1	AMPL25798034	0	3	acyl-CoA_synthetase_bubblegum_family_member_1
ACSBG2	AMPL14995441	0	0	acyl-CoA_synthetase_bubblegum_family_member_2
ACSF2	AMPL14062720	531	223	acyl-CoA_synthetase_family_member_2
ACSF3	AMPL4274602	468	285	acyl-CoA_synthetase_family_member_3
ACSL1	AMPL11069973	284	196	acyl-CoA_synthetase_long-chain_family_member_1
ACSL3	AMPL20843448	2621	2871	acyl-CoA_synthetase_long-chain_family_member_3
ACSL4	AMPL34850670	1330	1181	acyl-CoA_synthetase_long-chain_family_member_4
ACSL5	AMPL33055158	19	9	acyl-CoA_synthetase_long-chain_family_member_5
ACSL6	AMPL822010	0	2	acyl-CoA_synthetase_long-chain_family_member_6
ACSM1	AMPL16603618	0	0	acyl-CoA_synthetase_medium-chain_family_member_1
ACSM2A	AMPL334952	0	2	acyl-CoA_synthetase_medium-chain_family_member_2A
ACSM2B	AMPL2666630	1	0	acyl-CoA_synthetase_medium-chain_family_member_2B
ACSM3	AMPL27262281	710	466	acyl-CoA_synthetase_medium-chain_family_member_3
ACSM4	AMPL5532938	0	0	acyl-CoA_synthetase_medium-chain_family_member_4
ACSM5	AMPL31616389	1	0	acyl-CoA_synthetase_medium-chain_family_member_5
ACSS2	AMPL3974985	0	2	acyl-CoA_synthetase_short-chain_family_member_2
ACSS3	AMPL35061236	6	10	acyl-CoA_synthetase_short-chain_family_member_3
ACTA1	AMPL3109069	1	0	actin__alpha_1__skeletal_muscle
ACTA2	AMPL10957017	470	298	actin__alpha_2__smooth_muscle__aorta
ACTB	AMPL2343099	97702	95028	actin__beta
ACTBL2	AMPL622288	0	1	actin__beta-like_2
ACTC1	AMPL29562124	0	0	actin__alpha__cardiac_muscle_1
ACTG1	AMPL11974436	171498	103485	actin__gamma_1
ACTG2	AMPL10950176	1	2	actin__gamma_2__smooth_muscle__enteric
ACTL10	AMPL2454857	25	2	actin-like_10
ACTL6A	AMPL28278700	527	192	actin-like_6A
ACTL6B	AMPL31576066	0	0	actin-like_6B
ACTL7A	AMPL12419260	3	0	actin-like_7A
ACTL7B	AMPL12867683	0	0	actin-like_7B
ACTL8	AMPL15371795	11	16	actin-like_8
ACTL9	AMPL17671288	0	0	actin-like_9
ACTN1	AMPL1973635	5310	1987	actinin__alpha_1
ACTN2	AMPL5030630	0	0	actinin__alpha_2
ACTN3	AMPL5541705	3	0	actinin__alpha_3__gene_pseudogene
ACTN4	AMPL27772682	20680	11358	actinin__alpha_4
ACTR10	AMPL31210443	1026	1325	actin-related_protein_10_homolog__S._cerevisiae
ACTR1A	AMPL27124757	1303	1046	ARP1_actin-related_protein_1_homolog_A__centractin_alpha__yeast
ACTR1B	AMPL28501456	981	413	ARP1_actin-related_protein_1_homolog_B__centractin_beta__yeast
ACTR2	AMPL455942	8971	7520	ARP2_actin-related_protein_2_homolog__yeast
ACTR3	AMPL27246788	2524	4358	ARP3_actin-related_protein_3_homolog__yeast
ACTR3B	AMPL31366074	57	34	ARP3_actin-related_protein_3_homolog_B__yeast
ACTR3BP2	AMPL19061972	0	0	ACTR3B_pseudogene_2
ACTR3C	AMPL10018454	0	0	ARP3_actin-related_protein_3_homolog_C__yeast
ACTR5	AMPL14003590	371	313	ARP5_actin-related_protein_5_homolog__yeast
ACTR6	AMPL34871598	930	555	ARP6_actin-related_protein_6_homolog__yeast
ACTR8	AMPL34969596	543	619	ARP8_actin-related_protein_8_homolog__yeast
ACTRT1	AMPL16933847	0	0	actin-related_protein_T1
ACTRT2	AMPL16584409	0	0	actin-related_protein_T2
ACVR1	AMPL4747801	710	442	activin_A_receptor__type_I
ACVR1B	AMPL27122439	1421	1182	activin_A_receptor__type_IB
ACVR1C	AMPL34876114	0	3	activin_A_receptor__type_IC
ACVR2A	AMPL11796878	239	205	activin_A_receptor__type_IIA
ACVR2B	AMPL2043789	200	85	activin_A_receptor__type_IIB
ACVRL1	AMPL3042073	5	1	activin_A_receptor_type_II-like_1
ACY1	AMPL7726101	362	125	aminoacylase_1
ACY3	AMPL16070531	14	3	aspartoacylase__aminocyclase__3
ACYP1	AMPL1189550	559	355	acylphosphatase_1__erythrocyte__common__type
ACYP2	AMPL34331911	93	30	acylphosphatase_2__muscle_type
ADA	AMPL14907	830	474	adenosine_deaminase
ADAD1	AMPL11059743	0	0	adenosine_deaminase_domain_containing_1__testis-specific
ADAD2	AMPL3036899	1	0	adenosine_deaminase_domain_containing_2
ADAL	AMPL9122152	203	121	adenosine_deaminase-like
ADAM1A	AMPL37929566	62	31	ADAM_metallopeptidase_domain_1A__pseudogene
ADAM10	AMPL5356454	2400	1764	ADAM_metallopeptidase_domain_10
ADAM11	AMPL10853401	116	35	ADAM_metallopeptidase_domain_11
ADAM12	AMPL8224738	39	41	ADAM_metallopeptidase_domain_12
ADAM15	AMPL21702698	2483	2004	ADAM_metallopeptidase_domain_15
ADAM17	AMPL9492210	1755	1181	ADAM_metallopeptidase_domain_17
ADAM18	AMPL26677951	0	0	ADAM_metallopeptidase_domain_18
ADAM19	AMPL16635911	234	130	ADAM_metallopeptidase_domain_19
ADAM2	AMPL9859281	0	0	ADAM_metallopeptidase_domain_2
ADAM20	AMPL29329693	0	0	ADAM_metallopeptidase_domain_20
ADAM21	AMPL28327115	0	0	ADAM_metallopeptidase_domain_21
ADAM21P1	AMPL20247301	0	0	ADAM_metallopeptidase_domain_21_pseudogene_1
ADAM22	AMPL35543171	69	58	ADAM_metallopeptidase_domain_22
ADAM23	AMPL30434500	824	820	ADAM_metallopeptidase_domain_23
ADAM28	AMPL24340427	1	2	ADAM_metallopeptidase_domain_28
ADAM29	AMPL4683605	0	0	ADAM_metallopeptidase_domain_29
ADAM30	AMPL36028112	0	0	ADAM_metallopeptidase_domain_30
ADAM32	AMPL34657796	2	2	ADAM_metallopeptidase_domain_32
ADAM33	AMPL14567541	0	0	ADAM_metallopeptidase_domain_33
ADAM6	AMPL21011525	0	0	ADAM_metallopeptidase_domain_6__pseudogene
ADAM7	AMPL27156489	0	0	ADAM_metallopeptidase_domain_7
ADAM8	AMPL3680783	32	11	ADAM_metallopeptidase_domain_8
ADAM9	AMPL30180952	5302	6905	ADAM_metallopeptidase_domain_9
ADAMDEC1	AMPL25518329	0	0	ADAM-like__decysin_1
ADAMTS1	AMPL12518454	2	13	ADAM_metallopeptidase_with_thrombospondin_type_1_motif__1
ADAMTS10	AMPL13886090	1241	165	ADAM_metallopeptidase_with_thrombospondin_type_1_motif__10
ADAMTS12	AMPL13984628	84	77	ADAM_metallopeptidase_with_thrombospondin_type_1_motif__12
ADAMTS13	AMPL34222790	45	11	ADAM_metallopeptidase_with_thrombospondin_type_1_motif__13
ADAMTS14	AMPL34221540	1	0	ADAM_metallopeptidase_with_thrombospondin_type_1_motif__14
ADAMTS15	AMPL34751805	247	91	ADAM_metallopeptidase_with_thrombospondin_type_1_motif__15
ADAMTS16	AMPL36503115	60	36	ADAM_metallopeptidase_with_thrombospondin_type_1_motif__16
ADAMTS17	AMPL36219183	0	1	ADAM_metallopeptidase_with_thrombospondin_type_1_motif__17
ADAMTS18	AMPL20749181	0	0	ADAM_metallopeptidase_with_thrombospondin_type_1_motif__18
ADAMTS19	AMPL16545980	0	0	ADAM_metallopeptidase_with_thrombospondin_type_1_motif__19
ADAMTS2	AMPL24840415	2	4	ADAM_metallopeptidase_with_thrombospondin_type_1_motif__2
ADAMTS20	AMPL14625522	0	0	ADAM_metallopeptidase_with_thrombospondin_type_1_motif__20
ADAMTS3	AMPL25164827	0	1	ADAM_metallopeptidase_with_thrombospondin_type_1_motif__3
ADAMTS4	AMPL29336997	0	0	ADAM_metallopeptidase_with_thrombospondin_type_1_motif__4
ADAMTS5	AMPL13016703	0	0	ADAM_metallopeptidase_with_thrombospondin_type_1_motif__5
ADAMTS6	AMPL22131042	30	33	ADAM_metallopeptidase_with_thrombospondin_type_1_motif__6
ADAMTS7	AMPL25163880	147	67	ADAM_metallopeptidase_with_thrombospondin_type_1_motif__7
ADAMTS8	AMPL13492156	2	1	ADAM_metallopeptidase_with_thrombospondin_type_1_motif__8
ADAMTS9	AMPL21267509	768	639	ADAM_metallopeptidase_with_thrombospondin_type_1_motif__9
ADAMTSL1	AMPL2275530	8	3	ADAMTS-like_1
ADAMTSL2	AMPL26179066	0	0	ADAMTS-like_2
ADAMTSL3	AMPL20623991	4	4	ADAMTS-like_3
ADAMTSL4	AMPL31834387	98	24	ADAMTS-like_4
ADAMTSL5	AMPL22467937	79	24	ADAMTS-like_5
ADAP1	AMPL13089332	35	19	ArfGAP_with_dual_PH_domains_1
ADAP2	AMPL33363107	81	15	ArfGAP_with_dual_PH_domains_2
ADAR	AMPL2034972	5919	4812	adenosine_deaminase__RNA-specific
ADARB1	AMPL31054623	75	23	adenosine_deaminase__RNA-specific__B1
ADARB2	AMPL31630312	0	0	adenosine_deaminase__RNA-specific__B2__non-functional
ADAT1	AMPL13349119	581	312	adenosine_deaminase__tRNA-specific_1
ADAT2	AMPL22520040	82	59	adenosine_deaminase__tRNA-specific_2
ADAT3	AMPL18299087	9	2	adenosine_deaminase__tRNA-specific_3
ADC	AMPL17542234	0	1	arginine_decarboxylase
ADCK1	AMPL31264949	135	38	aarF_domain_containing_kinase_1
ADCK2	AMPL16627291	517	305	aarF_domain_containing_kinase_2
ADCK3	AMPL31812770	504	299	aarF_domain_containing_kinase_3
ADCK4	AMPL13847655	903	387	aarF_domain_containing_kinase_4
ADCK5	AMPL17892963	93	40	aarF_domain_containing_kinase_5
ADCY1	AMPL35550349	59	50	adenylate_cyclase_1__brain
ADCY10	AMPL34004882	2	2	adenylate_cyclase_10__soluble
ADCY2	AMPL33163652	2	1	adenylate_cyclase_2__brain
ADCY3	AMPL28097297	1268	1383	adenylate_cyclase_3
ADCY4	AMPL6688823	0	0	adenylate_cyclase_4
ADCY5	AMPL21168459	31	11	adenylate_cyclase_5
ADCY6	AMPL26296751	408	177	adenylate_cyclase_6
ADCY7	AMPL1616634	777	537	adenylate_cyclase_7
ADCY8	AMPL1610329	0	0	adenylate_cyclase_8__brain
ADCY9	AMPL5027590	259	92	adenylate_cyclase_9
ADCYAP1	AMPL1164370	0	0	adenylate_cyclase_activating_polypeptide_1__pituitary
ADCYAP1R1	AMPL7907659	1	1	adenylate_cyclase_activating_polypeptide_1__pituitary__receptor_type_I
ADD1	AMPL25603913	2446	1441	adducin_1__alpha
ADD2	AMPL6645050	2764	1478	adducin_2__beta
ADD3	AMPL32129789	306	328	adducin_3__gamma
ADH1A	AMPL6619820	0	0	alcohol_dehydrogenase_1A__class_I__alpha_polypeptide
ADH1B	AMPL4464467	0	0	alcohol_dehydrogenase_1B__class_I__beta_polypeptide
ADH1C	AMPL5308544	16	7	alcohol_dehydrogenase_1C__class_I__gamma_polypeptide
ADH4	AMPL4461484	9	6	alcohol_dehydrogenase_4__class_II__pi_polypeptide
ADH5	AMPL4966163	2661	2073	alcohol_dehydrogenase_5__class_III__chi_polypeptide
ADH6	AMPL5785513	65	31	alcohol_dehydrogenase_6__class_V
ADH7	AMPL7802209	0	0	alcohol_dehydrogenase_7__class_IV__mu_or_sigma_polypeptide
ADHFE1	AMPL34317048	29	16	alcohol_dehydrogenase__iron_containing__1
ADI1	AMPL31866011	842	1275	acireductone_dioxygenase_1
ADIG	AMPL602936	0	0	adipogenin
ADIPOQ	AMPL27192078	0	0	adiponectin__C1Q_and_collagen_domain_containing
ADIPOR1	AMPL31695533	2106	1492	adiponectin_receptor_1
ADIPOR2	AMPL35355444	1148	535	adiponectin_receptor_2
ADK	AMPL12034667	412	261	adenosine_kinase
ADM	AMPL2397925	1347	575	adrenomedullin
ADM2	AMPL15494089	0	0	adrenomedullin_2
ADNP	AMPL17440967	303	320	activity-dependent_neuroprotector_homeobox
ADNP2	AMPL25205542	778	883	ADNP_homeobox_2
ADO	AMPL18387740	471	292	2-aminoethanethiol__cysteamine__dioxygenase
ADORA1	AMPL4564339	0	3	adenosine_A1_receptor
ADORA2A	AMPL6410101	13	4	adenosine_A2a_receptor
ADORA2B	AMPL6301037	433	428	adenosine_A2b_receptor
ADORA3	AMPL2830687	0	0	adenosine_A3_receptor
ADPGK	AMPL14718156	574	488	ADP-dependent_glucokinase
ADPRH	AMPL2398335	1	6	ADP-ribosylarginine_hydrolase
ADPRHL1	AMPL36516773	417	103	ADP-ribosylhydrolase_like_1
ADPRHL2	AMPL33097884	222	148	ADP-ribosylhydrolase_like_2
ADRA1A	AMPL5301207	0	0	adrenoceptor_alpha_1A
ADRA1B	AMPL6138108	63	25	adrenoceptor_alpha_1B
ADRA1D	AMPL2289385	223	57	adrenoceptor_alpha_1D
ADRA2A	AMPL6617716	0	0	adrenoceptor_alpha_2A
ADRA2B	AMPL4079612	1	1	adrenoceptor_alpha_2B
ADRA2C	AMPL5645348	123	102	adrenoceptor_alpha_2C
ADRB1	AMPL3776117	7	4	adrenoceptor_beta_1
ADRB2	AMPL17586	7	13	adrenoceptor_beta_2__surface
ADRBK1	AMPL11597563	664	378	adrenergic__beta__receptor_kinase_1
ADRBK2	AMPL29216041	48	43	adrenergic__beta__receptor_kinase_2
ADRM1	AMPL18086059	2696	2229	adhesion_regulating_molecule_1
ADSL	AMPL4380658	2271	2707	adenylosuccinate_lyase
ADSS	AMPL2610798	458	467	adenylosuccinate_synthase
ADSSL1	AMPL21219235	2	1	adenylosuccinate_synthase_like_1
AEBP1	AMPL4545334	0	1	AE_binding_protein_1
AEBP2	AMPL3165160	1013	736	AE_binding_protein_2
AEN	AMPL36284041	578	622	apoptosis_enhancing_nuclease
AES	AMPL22022435	4654	3407	amino-terminal_enhancer_of_split
AFAP1	AMPL4237008	699	699	actin_filament_associated_protein_1
AFAP1L1	AMPL34860758	90	96	actin_filament_associated_protein_1-like_1
AFAP1L2	AMPL4882856	131	121	actin_filament_associated_protein_1-like_2
AFF1	AMPL10005698	1288	862	AF4_FMR2_family__member_1
AFF2	AMPL8227001	1	0	AF4_FMR2_family__member_2
AFF3	AMPL102967	1	2	AF4_FMR2_family__member_3
AFF4	AMPL25847116	1551	843	AF4_FMR2_family__member_4
AFG3L2	AMPL13261477	1047	1041	AFG3-like_AAA_ATPase_2
AFM	AMPL1744499	0	0	afamin
AFMID	AMPL987372	36	15	arylformamidase
AFP	AMPL3113735	0	1	alpha-fetoprotein
AFTPH	AMPL22206471	1195	763	aftiphilin
AGA	AMPL4009477	584	456	aspartylglucosaminidase
AGAP1	AMPL2731179	550	342	ArfGAP_with_GTPase_domain__ankyrin_repeat_and_PH_domain_1
AGAP11	AMPL16260060	0	0	ankyrin_repeat_and_GTPase_domain_Arf_GTPase_activating_protein_11
AGAP2	AMPL3157590	11	6	ArfGAP_with_GTPase_domain__ankyrin_repeat_and_PH_domain_2
AGAP3	AMPL14767362	860	486	ArfGAP_with_GTPase_domain__ankyrin_repeat_and_PH_domain_3
AGAP5	AMPL3505752	135	56	ArfGAP_with_GTPase_domain__ankyrin_repeat_and_PH_domain_5
AGAP6	AMPL3506164	116	44	ArfGAP_with_GTPase_domain__ankyrin_repeat_and_PH_domain_6
AGAP7	AMPL4406411	34	30	ArfGAP_with_GTPase_domain__ankyrin_repeat_and_PH_domain_7
AGBL1	AMPL34961845	0	0	ATP_GTP_binding_protein-like_1
AGBL2	AMPL14857508	34	34	ATP_GTP_binding_protein-like_2
AGBL3	AMPL16076755	2	3	ATP_GTP_binding_protein-like_3
AGBL4	AMPL17185985	0	0	ATP_GTP_binding_protein-like_4
AGBL5	AMPL37012619	262	107	ATP_GTP_binding_protein-like_5
AGER	AMPL4824929	57	11	advanced_glycosylation_end_product-specific_receptor
AGFG1	AMPL5430597	9	10	ArfGAP_with_FG_repeats_1
AGFG2	AMPL28690605	800	407	ArfGAP_with_FG_repeats_2
AGGF1	AMPL34146544	516	545	angiogenic_factor_with_G_patch_and_FHA_domains_1
AGK	AMPL33126771	7	7	acylglycerol_kinase
AGL	AMPL4466477	482	316	amylo-alpha-1__6-glucosidase__4-alpha-glucanotransferase
AGMAT	AMPL14242026	438	488	agmatine_ureohydrolase__agmatinase
AGMO	AMPL4169357	49	24	alkylglycerol_monooxygenase
AGPAT1	AMPL27753774	2113	1360	1-acylglycerol-3-phosphate_O-acyltransferase_1
AGPAT2	AMPL28923039	406	217	1-acylglycerol-3-phosphate_O-acyltransferase_2
AGPAT3	AMPL30912219	842	521	1-acylglycerol-3-phosphate_O-acyltransferase_3
AGPAT4	AMPL31168384	46	22	1-acylglycerol-3-phosphate_O-acyltransferase_4
AGPAT5	AMPL33369922	1380	1518	1-acylglycerol-3-phosphate_O-acyltransferase_5
AGPAT6	AMPL17450889	1114	987	1-acylglycerol-3-phosphate_O-acyltransferase_6
AGPAT9	AMPL16883513	1246	1344	1-acylglycerol-3-phosphate_O-acyltransferase_9
AGPHD1	AMPL808111	263	163	.
AGPS	AMPL7233191	2484	2280	alkylglycerone_phosphate_synthase
AGR2	AMPL29807822	8638	5504	anterior_gradient_2
AGR3	AMPL16716408	1	0	anterior_gradient_3
AGRN	AMPL22072684	1640	675	agrin
AGRP	AMPL6187841	0	0	agouti_related_protein_homolog__mouse
AGT	AMPL5044930	46	15	angiotensinogen__serpin_peptidase_inhibitor__clade_A__member_8
AGTPBP1	AMPL24193581	334	250	ATP_GTP_binding_protein_1
AGTR1	AMPL28493769	4	4	angiotensin_II_receptor__type_1
AGTR2	AMPL2284921	0	0	angiotensin_II_receptor__type_2
AGTRAP	AMPL32908210	1469	760	angiotensin_II_receptor-associated_protein
AGXT	AMPL5707630	0	0	alanine-glyoxylate_aminotransferase
AGXT2	AMPL14607117	0	0	alanine--glyoxylate_aminotransferase_2
AGXT2L1	AMPL15200431	5	0	.
AGXT2L2	AMPL17815321	87	27	.
AHCTF1	AMPL24502432	729	557	AT_hook_containing_transcription_factor_1
AHCY	AMPL6513225	3637	2421	adenosylhomocysteinase
AHCYL1	AMPL12531693	6482	3691	adenosylhomocysteinase-like_1
AHCYL2	AMPL25697829	187	93	adenosylhomocysteinase-like_2
AHDC1	AMPL1057102	74	23	AT_hook__DNA_binding_motif__containing_1
AHI1	AMPL1942925	602	441	Abelson_helper_integration_site_1
AHNAK	AMPL9665905	829	313	AHNAK_nucleoprotein
AHNAK2	AMPL15925511	2203	1067	AHNAK_nucleoprotein_2
AHR	AMPL8460815	638	424	aryl_hydrocarbon_receptor
AHRR	AMPL6723696	40	12	aryl-hydrocarbon_receptor_repressor
AHSA1	AMPL12442651	3158	4680	AHA1__activator_of_heat_shock_90kDa_protein_ATPase_homolog_1__yeast
AHSA2	AMPL35815659	702	192	AHA1__activator_of_heat_shock_90kDa_protein_ATPase_homolog_2__yeast
AHSG	AMPL8806376	0	3	alpha-2-HS-glycoprotein
AHSP	AMPL33141675	0	0	alpha_hemoglobin_stabilizing_protein
AICDA	AMPL33856885	7	0	activation-induced_cytidine_deaminase
AIDA	AMPL37166408	1997	1626	axin_interactor__dorsalization_associated
AIF1	AMPL9337479	0	0	allograft_inflammatory_factor_1
AIF1L	AMPL9048532	95	71	allograft_inflammatory_factor_1-like
AIFM1	AMPL29053334	2269	1972	apoptosis-inducing_factor__mitochondrion-associated__1
AIFM2	AMPL18491011	95	59	apoptosis-inducing_factor__mitochondrion-associated__2
AIG1	AMPL31828308	750	240	androgen-induced_1
AIM1	AMPL10190044	34	38	absent_in_melanoma_1
AIM1L	AMPL1518035	36	66	absent_in_melanoma_1-like
AIM2	AMPL29477917	0	3	absent_in_melanoma_2
AIMP1	AMPL3072893	867	856	aminoacyl_tRNA_synthetase_complex-interacting_multifunctional_protein_1
AIMP2	AMPL29395832	1329	1401	aminoacyl_tRNA_synthetase_complex-interacting_multifunctional_protein_2
AIP	AMPL30349915	601	211	aryl_hydrocarbon_receptor_interacting_protein
AIPL1	AMPL26186739	0	0	aryl_hydrocarbon_receptor_interacting_protein-like_1
AIRE	AMPL3980719	0	0	autoimmune_regulator
AJAP1	AMPL33590109	1	0	adherens_junctions_associated_protein_1
AJUBA	AMPL17925147	713	406	ajuba_LIM_protein
AK1	AMPL4829123	623	388	adenylate_kinase_1
AK2	AMPL9337370	4003	2982	adenylate_kinase_2
AK3	AMPL31565962	3160	1678	adenylate_kinase_3
AK4	AMPL21206662	1230	1102	adenylate_kinase_4
AK5	AMPL15584976	121	113	adenylate_kinase_5
AK7	AMPL34864212	77	78	adenylate_kinase_7
AK8	AMPL35337492	32	8	adenylate_kinase_8
AKAP1	AMPL8939013	813	552	A_kinase__PRKA__anchor_protein_1
AKAP10	AMPL12843172	362	469	A_kinase__PRKA__anchor_protein_10
AKAP11	AMPL31919600	806	726	A_kinase__PRKA__anchor_protein_11
AKAP12	AMPL28324222	3647	1595	A_kinase__PRKA__anchor_protein_12
AKAP13	AMPL12807121	371	187	A_kinase__PRKA__anchor_protein_13
AKAP14	AMPL17086115	0	0	A_kinase__PRKA__anchor_protein_14
AKAP17A	AMPL29936839	1578	1058	A_kinase__PRKA__anchor_protein_17A
AKAP3	AMPL28838810	0	0	A_kinase__PRKA__anchor_protein_3
AKAP4	AMPL29803384	0	0	A_kinase__PRKA__anchor_protein_4
AKAP5	AMPL29712517	12	7	A_kinase__PRKA__anchor_protein_5
AKAP6	AMPL27814001	21	27	A_kinase__PRKA__anchor_protein_6
AKAP7	AMPL33749638	134	92	A_kinase__PRKA__anchor_protein_7
AKAP8	AMPL27810382	384	242	A_kinase__PRKA__anchor_protein_8
AKAP8L	AMPL24571698	956	523	A_kinase__PRKA__anchor_protein_8-like
AKAP9	AMPL29548032	479	416	A_kinase__PRKA__anchor_protein_9
AKD1	AMPL1426829	0	1	.
AKIP1	AMPL31141810	649	413	A_kinase__PRKA__interacting_protein_1
AKIRIN1	AMPL14328752	1508	2129	akirin_1
AKIRIN2	AMPL32201952	325	430	akirin_2
AKNA	AMPL14940928	39	7	AT-hook_transcription_factor
AKNAD1	AMPL34920487	0	5	AKNA_domain_containing_1
AKR1A1	AMPL18343519	725	371	aldo-keto_reductase_family_1__member_A1__aldehyde_reductase
AKR1B1	AMPL11229510	12335	7338	aldo-keto_reductase_family_1__member_B1__aldose_reductase
AKR1B10	AMPL33771247	31910	37775	aldo-keto_reductase_family_1__member_B10__aldose_reductase
AKR1B15	AMPL1420019	96	60	aldo-keto_reductase_family_1__member_B15
AKR1C2	AMPL22530899	93623	47036	aldo-keto_reductase_family_1__member_C2
AKR1C3	AMPL11374661	23288	15127	aldo-keto_reductase_family_1__member_C3
AKR1C4	AMPL7374404	17	18	aldo-keto_reductase_family_1__member_C4
AKR1CL1	AMPL19573126	14	11	aldo-keto_reductase_family_1__member_C-like_1
AKR1D1	AMPL28785131	0	0	aldo-keto_reductase_family_1__member_D1
AKR1E2	AMPL4863640	325	222	aldo-keto_reductase_family_1__member_E2
AKR7A2	AMPL11279728	624	379	aldo-keto_reductase_family_7__member_A2__aflatoxin_aldehyde_reductase
AKR7A2P1	AMPL20987577	12	8	aldo-keto_reductase_family_7__member_A2_pseudogene_1
AKR7A3	AMPL12561431	18	2	aldo-keto_reductase_family_7__member_A3__aflatoxin_aldehyde_reductase
AKT1	AMPL2201548	920	515	v-akt_murine_thymoma_viral_oncogene_homolog_1
AKT1S1	AMPL4068096	196	75	AKT1_substrate_1__proline-rich
AKT2	AMPL11229610	4165	1955	v-akt_murine_thymoma_viral_oncogene_homolog_2
AKT3	AMPL27377045	2299	1895	v-akt_murine_thymoma_viral_oncogene_homolog_3
AKTIP	AMPL36896400	1107	854	AKT_interacting_protein
ALAD	AMPL3480870	214	109	aminolevulinate_dehydratase
ALAS1	AMPL22069278	220	149	aminolevulinate__delta-__synthase_1
ALAS2	AMPL3480101	0	0	aminolevulinate__delta-__synthase_2
ALB	AMPL3423532	0	2	albumin
ALCAM	AMPL11858852	4290	2663	activated_leukocyte_cell_adhesion_molecule
ALDH16A1	AMPL18045969	593	355	aldehyde_dehydrogenase_16_family__member_A1
ALDH18A1	AMPL7037388	1045	687	aldehyde_dehydrogenase_18_family__member_A1
ALDH1A1	AMPL2584612	62934	57849	aldehyde_dehydrogenase_1_family__member_A1
ALDH1A2	AMPL27274196	0	0	aldehyde_dehydrogenase_1_family__member_A2
ALDH1A3	AMPL4077113	27	9	aldehyde_dehydrogenase_1_family__member_A3
ALDH1B1	AMPL1645600	300	200	aldehyde_dehydrogenase_1_family__member_B1
ALDH1L1	AMPL13643494	5	1	aldehyde_dehydrogenase_1_family__member_L1
ALDH1L2	AMPL2106051	166	143	aldehyde_dehydrogenase_1_family__member_L2
ALDH2	AMPL5946293	5967	3106	aldehyde_dehydrogenase_2_family__mitochondrial
ALDH3A1	AMPL5433752	48410	32246	aldehyde_dehydrogenase_3_family__member_A1
ALDH3A2	AMPL403274	307	262	aldehyde_dehydrogenase_3_family__member_A2
ALDH3B1	AMPL2399513	5945	1435	aldehyde_dehydrogenase_3_family__member_B1
ALDH3B2	AMPL881330	0	1	aldehyde_dehydrogenase_3_family__member_B2
ALDH4A1	AMPL8722244	261	58	aldehyde_dehydrogenase_4_family__member_A1
ALDH5A1	AMPL18127695	338	152	aldehyde_dehydrogenase_5_family__member_A1
ALDH6A1	AMPL27138130	48	22	aldehyde_dehydrogenase_6_family__member_A1
ALDH7A1	AMPL6844965	1617	791	aldehyde_dehydrogenase_7_family__member_A1
ALDH8A1	AMPL37435508	0	0	aldehyde_dehydrogenase_8_family__member_A1
ALDH9A1	AMPL1883135	2936	2959	aldehyde_dehydrogenase_9_family__member_A1
ALDOB	AMPL6472190	0	0	aldolase_B__fructose-bisphosphate
ALDOC	AMPL27745921	256	60	aldolase_C__fructose-bisphosphate
ALG1	AMPL31292851	459	238	ALG1__chitobiosyldiphosphodolichol_beta-mannosyltransferase
ALG10	AMPL18594510	300	176	ALG10__alpha-1_2-glucosyltransferase
ALG10B	AMPL1418563	426	280	ALG10B__alpha-1_2-glucosyltransferase
ALG11	AMPL2388850	160	121	ALG11__alpha-1_2-mannosyltransferase
ALG12	AMPL34842536	691	369	ALG12__alpha-1_6-mannosyltransferase
ALG13	AMPL5357927	255	108	ALG13__UDP-N-acetylglucosaminyltransferase_subunit
ALG14	AMPL35421310	183	187	ALG14__UDP-N-acetylglucosaminyltransferase_subunit
ALG1L	AMPL975133	10	8	ALG1__chitobiosyldiphosphodolichol_beta-mannosyltransferase-like
ALG1L2	AMPL4079456	0	0	ALG1__chitobiosyldiphosphodolichol_beta-mannosyltransferase-like_2
ALG2	AMPL16019635	648	329	ALG2__alpha-1_3_1_6-mannosyltransferase
ALG3	AMPL29855627	41	35	ALG3__alpha-1_3-_mannosyltransferase
ALG5	AMPL13275880	651	740	ALG5__dolichyl-phosphate_beta-glucosyltransferase
ALG6	AMPL13276146	347	296	ALG6__alpha-1_3-glucosyltransferase
ALG8	AMPL35932088	916	714	ALG8__alpha-1_3-glucosyltransferase
ALG9	AMPL2877175	612	539	,ALG9__alpha-1_2-mannosyltransferase
ALK	AMPL27472922	0	0	anaplastic_lymphoma_receptor_tyrosine_kinase
ALKBH1	AMPL29086938	317	210	alkB__alkylation_repair_homolog_1__E._coli
ALKBH2	AMPL5379670	351	274	alkB__alkylation_repair_homolog_2__E._coli
ALKBH3	AMPL34905881	247	210	alkB__alkylation_repair_homolog_3__E._coli
ALKBH4	AMPL33950939	236	112	alkB__alkylation_repair_homolog_4__E._coli
ALKBH5	AMPL32207529	3469	2782	alkB__alkylation_repair_homolog_5__E._coli
ALKBH6	AMPL16025229	101	40	alkB__alkylation_repair_homolog_6__E._coli
ALKBH7	AMPL14755933	296	157	alkB__alkylation_repair_homolog_7__E._coli
ALKBH8	AMPL34914309	189	312	alkB__alkylation_repair_homolog_8__E._coli
ALLC	AMPL33475260	0	0	allantoicase
ALMS1	AMPL24373685	157	136	Alstrom_syndrome_1
ALOX12	AMPL6459272	9	2	arachidonate_12-lipoxygenase
ALOX12B	AMPL3909047	23	4	arachidonate_12-lipoxygenase__12R_type
ALOX15	AMPL5897851	1	1	arachidonate_15-lipoxygenase
ALOX15B	AMPL4818314	0	0	arachidonate_15-lipoxygenase__type_B
ALOX5	AMPL5297331	10	7	arachidonate_5-lipoxygenase
ALOX5AP	AMPL8205093	0	0	arachidonate_5-lipoxygenase-activating_protein
ALOXE3	AMPL6708784	9	4	arachidonate_lipoxygenase_3
ALPI	AMPL8630535	2	0	alkaline_phosphatase__intestinal
ALPK1	AMPL2334293	195	88	alpha-kinase_1
ALPK2	AMPL18451352	1	0	alpha-kinase_2
ALPK3	AMPL36711093	6	0	alpha-kinase_3
ALPL	AMPL6632993	5	5	alkaline_phosphatase__liver_bone_kidney
ALPP	AMPL7736957	3	1	alkaline_phosphatase__placental
ALPPL2	AMPL15314048	2	0	alkaline_phosphatase__placental-like_2
ALS2	AMPL35031102	461	405	amyotrophic_lateral_sclerosis_2__juvenile
ALS2CL	AMPL36468389	3	0	ALS2_C-terminal_like
ALS2CR11	AMPL7496493	0	0	amyotrophic_lateral_sclerosis_2__juvenile__chromosome_region__candidate_11
ALS2CR12	AMPL1988462	0	0	amyotrophic_lateral_sclerosis_2__juvenile__chromosome_region__candidate_12
ALS2CR8	AMPL5059997	82	49	.
ALX1	AMPL13309343	138	87	ALX_homeobox_1
ALX3	AMPL28742119	0	0	ALX_homeobox_3
ALX4	AMPL37329477	73	17	ALX_homeobox_4
ALYREF	AMPL29958727	3488	2835	Aly_REF_export_factor
AMACR	AMPL10862479	925	634	alpha-methylacyl-CoA_racemase
AMBN	AMPL32720632	0	0	ameloblastin__enamel_matrix_protein
AMBP	AMPL11363246	114	106	alpha-1-microglobulin_bikunin_precursor
AMBRA1	AMPL31630769	617	285	autophagy_beclin-1_regulator_1
AMD1	AMPL8287933	1169	1554	adenosylmethionine_decarboxylase_1
AMDHD1	AMPL34858353	59	46	amidohydrolase_domain_containing_1
AMDHD2	AMPL2449615	159	101	amidohydrolase_domain_containing_2
AMELX	AMPL21940900	0	0	amelogenin__X-linked
AMELY	AMPL2719487	0	0	amelogenin__Y-linked
AMFR	AMPL2075947	2300	2296	autocrine_motility_factor_receptor__E3_ubiquitin_protein_ligase
AMH	AMPL2343113	129	11	anti-Mullerian_hormone
AMHR2	AMPL33532248	6	1	anti-Mullerian_hormone_receptor__type_II
AMICA1	AMPL1077027	0	0	adhesion_molecule__interacts_with_CXADR_antigen_1
AMIGO1	AMPL32568453	17	8	adhesion_molecule_with_Ig-like_domain_1
AMIGO2	AMPL22412584	936	592	adhesion_molecule_with_Ig-like_domain_2
AMIGO3	AMPL21669050	81	24	adhesion_molecule_with_Ig-like_domain_3
AMMECR1	AMPL25176890	345	261	Alport_syndrome__mental_retardation__midface_hypoplasia_and_elliptocytosis_chromosomal_region_gene_1
AMMECR1L	AMPL14611009	744	627	AMMECR1-like
AMN	AMPL14111415	4	3	amnion_associated_transmembrane_protein
AMN1	AMPL5833253	274	283	antagonist_of_mitotic_exit_network_1_homolog__S._cerevisiae
AMOT	AMPL2636894	7	3	angiomotin
AMOTL1	AMPL16365402	215	131	angiomotin_like_1
AMOTL2	AMPL31029590	703	675	angiomotin_like_2
AMPD1	AMPL5358346	0	0	adenosine_monophosphate_deaminase_1
AMPD2	AMPL29535519	546	142	adenosine_monophosphate_deaminase_2
AMPD3	AMPL6417078	119	83	adenosine_monophosphate_deaminase_3
AMPH	AMPL7222892	1	1	amphiphysin
AMT	AMPL3809809	46	9	aminomethyltransferase
AMTN	AMPL21289863	0	1	amelotin
AMY2A	AMPL5487990	0	0	amylase__alpha_2A__pancreatic
AMY2B	AMPL37139584	7	2	amylase__alpha_2B__pancreatic
AMZ1	AMPL18672816	0	0	archaelysin_family_metallopeptidase_1
AMZ2	AMPL2740308	659	599	archaelysin_family_metallopeptidase_2
AMZ2P1	AMPL19291388	98	64	archaelysin_family_metallopeptidase_2_pseudogene_1
ANAPC1	AMPL36070128	958	1191	anaphase_promoting_complex_subunit_1
ANAPC10	AMPL24391977	452	286	anaphase_promoting_complex_subunit_10
ANAPC11	AMPL3298165	23	22	anaphase_promoting_complex_subunit_11
ANAPC13	AMPL25950088	1018	760	anaphase_promoting_complex_subunit_13
ANAPC16	AMPL10452389	2053	1511	anaphase_promoting_complex_subunit_16
ANAPC2	AMPL12098591	434	211	anaphase_promoting_complex_subunit_2
ANAPC4	AMPL12257521	247	405	anaphase_promoting_complex_subunit_4
ANAPC5	AMPL31816104	1824	2195	anaphase_promoting_complex_subunit_5
ANAPC7	AMPL31256765	1533	2066	anaphase_promoting_complex_subunit_7
ANG	AMPL3455908	0	0	angiogenin__ribonuclease__RNase_A_family__5
ANGEL1	AMPL24358262	417	214	angel_homolog_1__Drosophila
ANGEL2	AMPL34372286	514	415	angel_homolog_2__Drosophila
ANGPT1	AMPL8179530	31	37	angiopoietin_1
ANGPT2	AMPL8516283	0	0	angiopoietin_2
ANGPT4	AMPL32393464	0	0	angiopoietin_4
ANGPTL1	AMPL29265829	0	0	angiopoietin-like_1
ANGPTL2	AMPL13586251	0	0	angiopoietin-like_2
ANGPTL3	AMPL24564326	0	0	angiopoietin-like_3
ANGPTL4	AMPL34748637	302	85	angiopoietin-like_4
ANGPTL5	AMPL15633155	1	1	angiopoietin-like_5
ANGPTL6	AMPL15195100	4	1	angiopoietin-like_6
ANGPTL7	AMPL35657814	0	3	angiopoietin-like_7
ANK1	AMPL3903046	18	10	ankyrin_1__erythrocytic
ANK2	AMPL6720177	1	0	ankyrin_2__neuronal
ANK3	AMPL34797914	0	0	ankyrin_3__node_of_Ranvier__ankyrin_G
ANKAR	AMPL36185075	14	14	ankyrin_and_armadillo_repeat_containing
ANKDD1A	AMPL21493248	28	17	ankyrin_repeat_and_death_domain_containing_1A
ANKFN1	AMPL17326474	10	0	ankyrin-repeat_and_fibronectin_type_III_domain_containing_1
ANKFY1	AMPL30691539	1538	734	ankyrin_repeat_and_FYVE_domain_containing_1
ANKH	AMPL17976517	259	163	ANKH_inorganic_pyrophosphate_transport_regulator
ANKIB1	AMPL33457519	2198	2537	ankyrin_repeat_and_IBR_domain_containing_1
ANKK1	AMPL18154598	1	0	ankyrin_repeat_and_kinase_domain_containing_1
ANKLE1	AMPL35714014	2	1	ankyrin_repeat_and_LEM_domain_containing_1
ANKLE2	AMPL24961142	3032	1896	ankyrin_repeat_and_LEM_domain_containing_2
ANKMY1	AMPL32592071	186	80	ankyrin_repeat_and_MYND_domain_containing_1
ANKMY2	AMPL31811417	650	492	ankyrin_repeat_and_MYND_domain_containing_2
ANKRA2	AMPL36277959	327	327	ankyrin_repeat__family_A__RFXANK-like__2
ANKRD1	AMPL25160169	9	55	ankyrin_repeat_domain_1__cardiac_muscle
ANKRD10	AMPL33488490	434	253	ankyrin_repeat_domain_10
ANKRD11	AMPL12668534	930	554	ankyrin_repeat_domain_11
ANKRD12	AMPL24771265	1350	1278	ankyrin_repeat_domain_12
ANKRD13A	AMPL16018041	358	248	ankyrin_repeat_domain_13A
ANKRD13B	AMPL35906940	434	174	ankyrin_repeat_domain_13B
ANKRD13C	AMPL14410351	650	623	ankyrin_repeat_domain_13C
ANKRD13D	AMPL21751871	107	37	ankyrin_repeat_domain_13_family__member_D
ANKRD16	AMPL30683590	149	66	ankyrin_repeat_domain_16
ANKRD17	AMPL14446977	498	293	ankyrin_repeat_domain_17
ANKRD18A	AMPL35605173	1020	1104	ankyrin_repeat_domain_18A
ANKRD2	AMPL31154105	6	3	ankyrin_repeat_domain_2__stretch_responsive_muscle
ANKRD20A4	AMPL5362524	60	36	ankyrin_repeat_domain_20_family__member_A4
ANKRD20A9P	AMPL20476305	171	98	ankyrin_repeat_domain_20_family__member_A9__pseudogene
ANKRD22	AMPL34511957	9	14	ankyrin_repeat_domain_22
ANKRD23	AMPL36017673	135	58	ankyrin_repeat_domain_23
ANKRD24	AMPL17590789	13	8	ankyrin_repeat_domain_24
ANKRD26	AMPL24978064	286	337	ankyrin_repeat_domain_26
ANKRD26P1	AMPL19425696	0	0	ankyrin_repeat_domain_26_pseudogene_1
ANKRD26P3	AMPL18968089	0	0	ankyrin_repeat_domain_26_pseudogene_3
ANKRD27	AMPL14208175	352	147	ankyrin_repeat_domain_27__VPS9_domain
ANKRD28	AMPL24951768	463	192	ankyrin_repeat_domain_28
ANKRD29	AMPL16129920	203	145	ankyrin_repeat_domain_29
ANKRD30A	AMPL17337025	0	0	ankyrin_repeat_domain_30A
ANKRD30B	AMPL4326370	0	0	ankyrin_repeat_domain_30B
ANKRD30BL	AMPL19500249	0	0	ankyrin_repeat_domain_30B-like
ANKRD31	AMPL9101204	5	2	ankyrin_repeat_domain_31
ANKRD32	AMPL14647652	452	387	ankyrin_repeat_domain_32
ANKRD33	AMPL21996386	0	0	ankyrin_repeat_domain_33
ANKRD33B	AMPL7659989	142	83	ankyrin_repeat_domain_33B
ANKRD34A	AMPL5450829	18	2	,ankyrin_repeat_domain_34A
ANKRD34B	AMPL2869363	0	0	ankyrin_repeat_domain_34B
ANKRD34C	AMPL7208752	0	0	ankyrin_repeat_domain_34C
ANKRD35	AMPL34799401	0	1	ankyrin_repeat_domain_35
ANKRD36	AMPL8792193	393	150	ankyrin_repeat_domain_36
ANKRD36B	AMPL13943170	283	118	ankyrin_repeat_domain_36B
ANKRD37	AMPL22049464	81	102	ankyrin_repeat_domain_37
ANKRD39	AMPL32017062	174	56	ankyrin_repeat_domain_39
ANKRD40	AMPL18353970	2438	1748	ankyrin_repeat_domain_40
ANKRD42	AMPL22517761	107	89	ankyrin_repeat_domain_42
ANKRD44	AMPL9177370	20	39	ankyrin_repeat_domain_44
ANKRD45	AMPL20873877	0	0	ankyrin_repeat_domain_45
ANKRD46	AMPL21240934	14	5	ankyrin_repeat_domain_46
ANKRD49	AMPL32450637	122	84	ankyrin_repeat_domain_49
ANKRD5	AMPL22443586	392	315	.
ANKRD50	AMPL30771064	259	128	ankyrin_repeat_domain_50
ANKRD52	AMPL16836498	1198	1148	ankyrin_repeat_domain_52
ANKRD53	AMPL1609624	0	0	ankyrin_repeat_domain_53
ANKRD54	AMPL34517031	577	345	ankyrin_repeat_domain_54
ANKRD55	AMPL13960456	0	0	ankyrin_repeat_domain_55
ANKRD6	AMPL11755041	61	26	ankyrin_repeat_domain_6
ANKRD63	AMPL7747663	0	0	ankyrin_repeat_domain_63
ANKRD65	AMPL4183342	0	0	ankyrin_repeat_domain_65
ANKRD7	AMPL33557500	1	1	ankyrin_repeat_domain_7
ANKRD9	AMPL36459504	233	93	ankyrin_repeat_domain_9
ANKS1A	AMPL26465423	407	219	ankyrin_repeat_and_sterile_alpha_motif_domain_containing_1A
ANKS1B	AMPL34714356	33	12	ankyrin_repeat_and_sterile_alpha_motif_domain_containing_1B
ANKS3	AMPL17675986	342	243	ankyrin_repeat_and_sterile_alpha_motif_domain_containing_3
ANKS4B	AMPL34875521	51	47	ankyrin_repeat_and_sterile_alpha_motif_domain_containing_4B
ANKS6	AMPL16841744	745	380	ankyrin_repeat_and_sterile_alpha_motif_domain_containing_6
ANKUB1	AMPL4614985	0	0	ankyrin_repeat_and_ubiquitin_domain_containing_1
ANKZF1	AMPL30630532	443	139	ankyrin_repeat_and_zinc_finger_domain_containing_1
ANLN	AMPL32836711	3906	4450	anillin__actin_binding_protein
ANO1	AMPL34146591	1	9	anoctamin_1__calcium_activated_chloride_channel
ANO10	AMPL33019118	484	415	anoctamin_10
ANO2	AMPL32689139	0	1	anoctamin_2
ANO3	AMPL15259713	2	0	anoctamin_3
ANO4	AMPL17079243	9	8	anoctamin_4
ANO5	AMPL21795165	673	552	anoctamin_5
ANO6	AMPL9604791	1854	1071	anoctamin_6
ANO7	AMPL3316993	0	0	anoctamin_7
ANO8	AMPL36810556	146	44	anoctamin_8
ANO9	AMPL32258	1	0	anoctamin_9
ANP32A	AMPL20452969	4775	3048	acidic__leucine-rich__nuclear_phosphoprotein_32_family__member_A
ANP32AP1	AMPL20453105	33	8	acidic__leucine-rich__nuclear_phosphoprotein_32_family__member_A_pseudogene_1
ANP32B	AMPL27082719	7944	9382	acidic__leucine-rich__nuclear_phosphoprotein_32_family__member_B
ANP32C	AMPL12551196	19	15	acidic__leucine-rich__nuclear_phosphoprotein_32_family__member_C
ANP32D	AMPL13633965	0	0	acidic__leucine-rich__nuclear_phosphoprotein_32_family__member_D
ANP32E	AMPL14939326	2152	2333	acidic__leucine-rich__nuclear_phosphoprotein_32_family__member_E
ANPEP	AMPL7207435	211	86	alanyl__membrane__aminopeptidase
ANTXR1	AMPL14025983	1448	744	anthrax_toxin_receptor_1
ANTXR2	AMPL5857426	104	91	anthrax_toxin_receptor_2
ANXA1	AMPL1652091	37269	34252	annexin_A1
ANXA10	AMPL13422619	164	213	annexin_A10
ANXA11	AMPL9410653	2759	1394	annexin_A11
ANXA13	AMPL5378296	360	230	annexin_A13
ANXA2	AMPL1271385	73303	61011	annexin_A2
ANXA2P1	AMPL20829580	0	0	annexin_A2_pseudogene_1
ANXA2P3	AMPL22422099	0	0	annexin_A2_pseudogene_3
ANXA3	AMPL28112865	909	823	annexin_A3
ANXA4	AMPL7370588	12643	8708	annexin_A4
ANXA5	AMPL10220775	6238	4099	annexin_A5
ANXA6	AMPL6719539	1244	1241	annexin_A6
ANXA7	AMPL27613603	3317	3868	annexin_A7
ANXA8L1	AMPL5960547	84	83	annexin_A8-like_1
ANXA8L2	AMPL8634535	0	1	annexin_A8-like_2
ANXA9	AMPL9926540	84	42	annexin_A9
AOAH	AMPL8585163	0	0	acyloxyacyl_hydrolase__neutrophil
AOC2	AMPL13002505	32	25	amine_oxidase__copper_containing_2__retina-specific
AOC3	AMPL8372075	34	7	amine_oxidase__copper_containing_3
AOX1	AMPL6719129	17	64	aldehyde_oxidase_1
AP1AR	AMPL32617491	119	102	adaptor-related_protein_complex_1_associated_regulatory_protein
AP1B1	AMPL2186795	1272	908	adaptor-related_protein_complex_1__beta_1_subunit
AP1B1P1	AMPL37551746	0	0	adaptor-related_protein_complex_1__beta_1_subunit_pseudogene_1
AP1G1	AMPL1585666	1653	1073	adaptor-related_protein_complex_1__gamma_1_subunit
AP1G2	AMPL28698665	721	355	adaptor-related_protein_complex_1__gamma_2_subunit
AP1M1	AMPL4137459	2363	2048	adaptor-related_protein_complex_1__mu_1_subunit
AP1M2	AMPL26901130	406	232	adaptor-related_protein_complex_1__mu_2_subunit
AP1S1	AMPL10075407	1652	1424	adaptor-related_protein_complex_1__sigma_1_subunit
AP1S2	AMPL28952157	606	575	adaptor-related_protein_complex_1__sigma_2_subunit
AP1S3	AMPL1157604	388	538	adaptor-related_protein_complex_1__sigma_3_subunit
AP2A1	AMPL24579572	2566	1366	adaptor-related_protein_complex_2__alpha_1_subunit
AP2A2	AMPL7806785	1948	1408	adaptor-related_protein_complex_2__alpha_2_subunit
AP2B1	AMPL1322435	6813	7227	adaptor-related_protein_complex_2__beta_1_subunit
AP2M1	AMPL1063016	7671	3299	adaptor-related_protein_complex_2__mu_1_subunit
AP2S1	AMPL28682469	3311	2777	adaptor-related_protein_complex_2__sigma_1_subunit
AP3B1	AMPL9441138	1459	1337	adaptor-related_protein_complex_3__beta_1_subunit
AP3B2	AMPL28370059	3	1	adaptor-related_protein_complex_3__beta_2_subunit
AP3D1	AMPL28947105	860	348	adaptor-related_protein_complex_3__delta_1_subunit
AP3M1	AMPL13532101	1904	1287	adaptor-related_protein_complex_3__mu_1_subunit
AP3M2	AMPL13497451	306	159	adaptor-related_protein_complex_3__mu_2_subunit
AP3S1	AMPL9716384	450	887	adaptor-related_protein_complex_3__sigma_1_subunit
AP4E1	AMPL13648211	213	460	adaptor-related_protein_complex_4__epsilon_1_subunit
AP4M1	AMPL27323776	189	89	adaptor-related_protein_complex_4__mu_1_subunit
APAF1	AMPL21283149	208	185	apoptotic_peptidase_activating_factor_1
APBA1	AMPL7194659	17	7	amyloid_beta__A4__precursor_protein-binding__family_A__member_1
APBA2	AMPL28174574	223	131	amyloid_beta__A4__precursor_protein-binding__family_A__member_2
APBA3	AMPL29949038	308	92	amyloid_beta__A4__precursor_protein-binding__family_A__member_3
APBB1	AMPL34302748	479	182	amyloid_beta__A4__precursor_protein-binding__family_B__member_1__Fe65
APBB1IP	AMPL30801646	101	42	amyloid_beta__A4__precursor_protein-binding__family_B__member_1_interacting_protein
APBB2	AMPL28925928	324	185	amyloid_beta__A4__precursor_protein-binding__family_B__member_2
APBB3	AMPL17216652	21	8	amyloid_beta__A4__precursor_protein-binding__family_B__member_3
APC	AMPL1716059	378	422	adenomatous_polyposis_coli
APC2	AMPL28143189	29	17	adenomatosis_polyposis_coli_2
APCDD1	AMPL17835431	0	0	adenomatosis_polyposis_coli_down-regulated_1
APCDD1L	AMPL17418828	0	2	adenomatosis_polyposis_coli_down-regulated_1-like
APCS	AMPL11102414	1	0	amyloid_P_component__serum
APEH	AMPL10547564	1186	761	acylaminoacyl-peptide_hydrolase
APEX2	AMPL24654021	488	332	APEX_nuclease__apurinic_apyrimidinic_endonuclease__2
APH1A	AMPL1108511	2588	1930	APH1A_gamma_secretase_subunit
APH1B	AMPL14221217	633	412	APH1B_gamma_secretase_subunit
API5	AMPL6037361	4027	5331	apoptosis_inhibitor_5
APIP	AMPL33661053	1224	1001	APAF1_interacting_protein
APLF	AMPL16932013	134	104	aprataxin_and_PNKP_like_factor
APLN	AMPL32005347	11	6	apelin
APLNR	AMPL28898163	0	0	apelin_receptor
APLP1	AMPL593202	1250	698	amyloid_beta__A4__precursor-like_protein_1
APOA1	AMPL3457173	10	2	apolipoprotein_A-I
APOA1BP	AMPL34409624	1421	903	apolipoprotein_A-I_binding_protein
APOA2	AMPL7222820	0	0	apolipoprotein_A-II
APOA4	AMPL6161541	0	0	apolipoprotein_A-IV
APOA5	AMPL6817420	0	0	apolipoprotein_A-V
APOB	AMPL6203223	0	1	apolipoprotein_B
APOBEC1	AMPL9337570	2	0	apolipoprotein_B_mRNA_editing_enzyme__catalytic_polypeptide_1
APOBEC2	AMPL12408804	0	0	apolipoprotein_B_mRNA_editing_enzyme__catalytic_polypeptide-like_2
APOBEC3B	AMPL28135746	155	67	apolipoprotein_B_mRNA_editing_enzyme__catalytic_polypeptide-like_3B
APOBEC3C	AMPL24831225	1320	788	apolipoprotein_B_mRNA_editing_enzyme__catalytic_polypeptide-like_3C
APOBEC3D	AMPL34394954	3	6	apolipoprotein_B_mRNA_editing_enzyme__catalytic_polypeptide-like_3D
APOBEC3F	AMPL35254548	170	61	apolipoprotein_B_mRNA_editing_enzyme__catalytic_polypeptide-like_3F
APOBEC3H	AMPL10183976	0	0	apolipoprotein_B_mRNA_editing_enzyme__catalytic_polypeptide-like_3H
APOBEC4	AMPL22322135	0	0	apolipoprotein_B_mRNA_editing_enzyme__catalytic_polypeptide-like_4__putative
APOBR	AMPL33891384	3	0	apolipoprotein_B_receptor
APOC1	AMPL11973318	1929	1394	apolipoprotein_C-I
APOC3	AMPL5017727	0	0	apolipoprotein_C-III
APOC4	AMPL9661836	0	0	apolipoprotein_C-IV
APOD	AMPL7397388	21	3	apolipoprotein_D
APOE	AMPL4845231	116	73	apolipoprotein_E
APOF	AMPL11723315	0	0	apolipoprotein_F
APOH	AMPL3458363	337	225	apolipoprotein_H__beta-2-glycoprotein_I
APOL1	AMPL6306627	850	474	apolipoprotein_L__1
APOL2	AMPL35255606	7	6	apolipoprotein_L__2
APOL3	AMPL35071303	5	3	apolipoprotein_L__3
APOL4	AMPL36274441	0	0	apolipoprotein_L__4
APOL5	AMPL14615148	0	0	apolipoprotein_L__5
APOL6	AMPL15372590	179	82	apolipoprotein_L__6
APOM	AMPL30924857	55	18	apolipoprotein_M
APOO	AMPL35070311	578	512	apolipoprotein_O
APOOL	AMPL21772651	325	136	apolipoprotein_O-like
APP	AMPL3073990	4372	2499	amyloid_beta__A4__precursor_protein
APPBP2	AMPL26976847	1309	1022	amyloid_beta_precursor_protein__cytoplasmic_tail__binding_protein_2
APPL1	AMPL12943022	890	728	adaptor_protein__phosphotyrosine_interaction__PH_domain_and_leucine_zipper_containing_1
APPL2	AMPL30625295	863	662	adaptor_protein__phosphotyrosine_interaction__PH_domain_and_leucine_zipper_containing_2
APRT	AMPL3627841	4209	3768	adenine_phosphoribosyltransferase
APTX	AMPL7137611	858	1055	aprataxin
AQP10	AMPL17436819	0	0	aquaporin_10
AQP11	AMPL18024692	15	41	aquaporin_11
AQP12A	AMPL21914724	0	0	aquaporin_12A
AQP12B	AMPL5346732	0	0	aquaporin_12B
AQP2	AMPL6629955	0	0	aquaporin_2__collecting_duct
AQP3	AMPL30500813	218	71	aquaporin_3__Gill_blood_group
AQP4	AMPL8630112	2	3	aquaporin_4
AQP5	AMPL11910797	0	0	aquaporin_5
AQP6	AMPL10187328	2	1	aquaporin_6__kidney_specific
AQP7	AMPL6815843	13	8	aquaporin_7
AQP7P1	AMPL20748416	3	5	aquaporin_7_pseudogene_1
AQP8	AMPL7787064	0	0	aquaporin_8
AQP9	AMPL35331803	1	0	aquaporin_9
AQPEP	AMPL16918060	2	5	Aminopeptidase_Q_Source_UniProtKB_Swiss-Prot_Acc_Q6Q4G3
AQR	AMPL24481543	2823	2677	aquarius_intron-binding_spliceosomal_factor
AR	AMPL1447304	742	436	androgen_receptor
ARAF	AMPL11228407	1176	551	v-raf_murine_sarcoma_3611_viral_oncogene_homolog
ARAP1	AMPL5750713	532	238	ArfGAP_with_RhoGAP_domain__ankyrin_repeat_and_PH_domain_1
ARAP2	AMPL24441283	30	26	ArfGAP_with_RhoGAP_domain__ankyrin_repeat_and_PH_domain_2
ARAP3	AMPL35626501	276	164	ArfGAP_with_RhoGAP_domain__ankyrin_repeat_and_PH_domain_3
ARC	AMPL25553294	0	1	activity-regulated_cytoskeleton-associated_protein
ARCN1	AMPL9660063	3459	2750	archain_1
AREG	AMPL10019040	1059	1275	amphiregulin
ARF1	AMPL2170137	12769	9366	ADP-ribosylation_factor_1
ARF3	AMPL8799459	4682	2583	ADP-ribosylation_factor_3
ARF4	AMPL9658366	3858	5911	ADP-ribosylation_factor_4
ARF5	AMPL8457203	2840	1759	ADP-ribosylation_factor_5
ARF6	AMPL11094387	9	11	ADP-ribosylation_factor_6
ARFGAP1	AMPL16820874	652	475	ADP-ribosylation_factor_GTPase_activating_protein_1
ARFGAP2	AMPL14810875	191	103	ADP-ribosylation_factor_GTPase_activating_protein_2
ARFGAP3	AMPL25927686	710	323	ADP-ribosylation_factor_GTPase_activating_protein_3
ARFGEF1	AMPL26851562	223	273	ADP-ribosylation_factor_guanine_nucleotide-exchange_factor_1__brefeldin_A-inhibited
ARFGEF2	AMPL27028369	1147	895	ADP-ribosylation_factor_guanine_nucleotide-exchange_factor_2__brefeldin_A-inhibited
ARFIP1	AMPL301805	448	313	ADP-ribosylation_factor_interacting_protein_1
ARFIP2	AMPL7454420	862	689	ADP-ribosylation_factor_interacting_protein_2
ARFRP1	AMPL7935385	676	512	ADP-ribosylation_factor_related_protein_1
ARG1	AMPL5980666	0	0	arginase_1
ARG2	AMPL6703028	21	2	arginase_2
ARGFX	AMPL323867	1	0	arginine-fifty_homeobox
ARGLU1	AMPL31888154	471	319	arginine_and_glutamate_rich_1
ARHGAP1	AMPL27121323	2021	1267	Rho_GTPase_activating_protein_1
ARHGAP10	AMPL14748157	185	172	Rho_GTPase_activating_protein_10
ARHGAP11A	AMPL24399296	1772	2231	Rho_GTPase_activating_protein_11A
ARHGAP11B	AMPL3076805	664	501	Rho_GTPase_activating_protein_11B
ARHGAP12	AMPL31765426	421	279	Rho_GTPase_activating_protein_12
ARHGAP15	AMPL32061520	6	1	Rho_GTPase_activating_protein_15
ARHGAP17	AMPL1921317	1741	1106	Rho_GTPase_activating_protein_17
ARHGAP18	AMPL17996718	930	709	Rho_GTPase_activating_protein_18
ARHGAP19	AMPL16772156	110	72	Rho_GTPase_activating_protein_19
ARHGAP20	AMPL35244475	2	0	Rho_GTPase_activating_protein_20
ARHGAP21	AMPL35241056	482	691	Rho_GTPase_activating_protein_21
ARHGAP22	AMPL35775372	2	5	Rho_GTPase_activating_protein_22
ARHGAP23	AMPL8055376	206	119	Rho_GTPase_activating_protein_23
ARHGAP24	AMPL2410067	62	25	Rho_GTPase_activating_protein_24
ARHGAP25	AMPL231929	10	4	Rho_GTPase_activating_protein_25
ARHGAP26	AMPL25194546	96	100	Rho_GTPase_activating_protein_26
ARHGAP27	AMPL21665258	197	84	Rho_GTPase_activating_protein_27
ARHGAP28	AMPL520314	1	0	Rho_GTPase_activating_protein_28
ARHGAP29	AMPL28005459	586	605	Rho_GTPase_activating_protein_29
ARHGAP30	AMPL101118	0	0	Rho_GTPase_activating_protein_30
ARHGAP31	AMPL30643856	39	34	Rho_GTPase_activating_protein_31
ARHGAP32	AMPL1697744	203	123	Rho_GTPase_activating_protein_32
ARHGAP33	AMPL17251222	397	116	Rho_GTPase_activating_protein_33
ARHGAP35	AMPL27233098	3195	2388	Rho_GTPase_activating_protein_35
ARHGAP36	AMPL34363299	0	0	Rho_GTPase_activating_protein_36
ARHGAP39	AMPL15536636	4	2	Rho_GTPase_activating_protein_39
ARHGAP4	AMPL11720513	5	0	Rho_GTPase_activating_protein_4
ARHGAP40	AMPL9248970	0	0	Rho_GTPase_activating_protein_40
ARHGAP42	AMPL36118106	311	176	Rho_GTPase_activating_protein_42
ARHGAP44	AMPL26560260	167	124	Rho_GTPase_activating_protein_44
ARHGAP5	AMPL961610	1187	1095	Rho_GTPase_activating_protein_5
ARHGAP6	AMPL24850883	0	0	Rho_GTPase_activating_protein_6
ARHGAP9	AMPL14147499	1	0	Rho_GTPase_activating_protein_9
ARHGDIA	AMPL27936319	35	22	Rho_GDP_dissociation_inhibitor__GDI__alpha
ARHGDIB	AMPL9673655	7	43	Rho_GDP_dissociation_inhibitor__GDI__beta
ARHGDIG	AMPL8742583	18	18	Rho_GDP_dissociation_inhibitor__GDI__gamma
ARHGEF1	AMPL21766308	1384	851	Rho_guanine_nucleotide_exchange_factor__GEF__1
ARHGEF10	AMPL25228117	716	308	Rho_guanine_nucleotide_exchange_factor__GEF__10
ARHGEF10L	AMPL34140019	519	216	Rho_guanine_nucleotide_exchange_factor__GEF__10-like
ARHGEF11	AMPL21429644	758	614	Rho_guanine_nucleotide_exchange_factor__GEF__11
ARHGEF12	AMPL24187275	2070	1975	Rho_guanine_nucleotide_exchange_factor__GEF__12
ARHGEF15	AMPL18576231	0	0	Rho_guanine_nucleotide_exchange_factor__GEF__15
ARHGEF16	AMPL25332281	68	28	Rho_guanine_nucleotide_exchange_factor__GEF__16
ARHGEF17	AMPL24470202	534	219	Rho_guanine_nucleotide_exchange_factor__GEF__17
ARHGEF18	AMPL4685240	360	292	Rho_Rac_guanine_nucleotide_exchange_factor__GEF__18
ARHGEF19	AMPL16057904	131	103	Rho_guanine_nucleotide_exchange_factor__GEF__19
ARHGEF2	AMPL6668309	195	117	Rho_Rac_guanine_nucleotide_exchange_factor__GEF__2
ARHGEF25	AMPL2824166	0	0	Rho_guanine_nucleotide_exchange_factor__GEF__25
ARHGEF3	AMPL2373619	237	192	Rho_guanine_nucleotide_exchange_factor__GEF__3
ARHGEF33	AMPL1865299	1	2	Rho_guanine_nucleotide_exchange_factor__GEF__33
ARHGEF35	AMPL3277331	0	0	Rho_guanine_nucleotide_exchange_factor__GEF__35
ARHGEF37	AMPL5227034	55	45	Rho_guanine_nucleotide_exchange_factor__GEF__37
ARHGEF38	AMPL7283252	0	0	Rho_guanine_nucleotide_exchange_factor__GEF__38
ARHGEF40	AMPL30635421	213	55	Rho_guanine_nucleotide_exchange_factor__GEF__40
ARHGEF5	AMPL27015853	1	1	Rho_guanine_nucleotide_exchange_factor__GEF__5
ARHGEF6	AMPL27884421	7	3	Rac_Cdc42_guanine_nucleotide_exchange_factor__GEF__6
ARHGEF7	AMPL2421631	358	138	Rho_guanine_nucleotide_exchange_factor__GEF__7
ARHGEF9	AMPL10514676	503	244	Cdc42_guanine_nucleotide_exchange_factor__GEF__9
ARID1A	AMPL28474827	1474	878	AT_rich_interactive_domain_1A__SWI-like
ARID1B	AMPL32564113	1310	1159	AT_rich_interactive_domain_1B__SWI1-like
ARID2	AMPL34284744	657	347	AT_rich_interactive_domain_2__ARID__RFX-like
ARID3A	AMPL29144110	273	172	AT_rich_interactive_domain_3A__BRIGHT-like
ARID3B	AMPL29599317	150	113	AT_rich_interactive_domain_3B__BRIGHT-like
ARID3C	AMPL2189822	4	4	AT_rich_interactive_domain_3C__BRIGHT-like
ARID4A	AMPL9822933	750	721	AT_rich_interactive_domain_4A__RBP1-like
ARID4B	AMPL33406651	704	811	AT_rich_interactive_domain_4B__RBP1-like
ARID5A	AMPL21114631	1	1	AT_rich_interactive_domain_5A__MRF1-like
ARID5B	AMPL14260182	285	53	AT_rich_interactive_domain_5B__MRF1-like
ARIH1	AMPL27245002	1306	1294	ariadne_RBR_E3_ubiquitin_protein_ligase_1
ARIH2	AMPL27307860	1132	1390	ariadne_RBR_E3_ubiquitin_protein_ligase_2
ARL1	AMPL6699616	2979	2741	ADP-ribosylation_factor-like_1
ARL10	AMPL17770462	6	3	ADP-ribosylation_factor-like_10
ARL11	AMPL34675105	0	0	ADP-ribosylation_factor-like_11
ARL13A	AMPL6828215	0	0	ADP-ribosylation_factor-like_13A
ARL13B	AMPL7306663	307	478	ADP-ribosylation_factor-like_13B
ARL14	AMPL13905568	34	48	ADP-ribosylation_factor-like_14
ARL15	AMPL32044440	275	182	ADP-ribosylation_factor-like_15
ARL16	AMPL2906470	605	366	ADP-ribosylation_factor-like_16
ARL17A	AMPL5522145	1139	428	ADP-ribosylation_factor-like_17A
ARL2	AMPL8281912	1211	471	ADP-ribosylation_factor-like_2
ARL2BP	AMPL12169853	1840	1413	ADP-ribosylation_factor-like_2_binding_protein
ARL3	AMPL30334919	1440	938	ADP-ribosylation_factor-like_3
ARL4A	AMPL21599164	136	178	ADP-ribosylation_factor-like_4A
ARL4C	AMPL28078998	988	764	ADP-ribosylation_factor-like_4C
ARL4D	AMPL10359223	208	71	ADP-ribosylation_factor-like_4D
ARL5A	AMPL12999048	330	633	ADP-ribosylation_factor-like_5A
ARL5B	AMPL17187296	1184	1099	ADP-ribosylation_factor-like_5B
ARL5C	AMPL4623129	0	0	ADP-ribosylation_factor-like_5C
ARL6	AMPL16389715	3	7	ADP-ribosylation_factor-like_6
ARL6IP1	AMPL26302776	7828	6267	ADP-ribosylation_factor-like_6_interacting_protein_1
ARL6IP4	AMPL31843718	879	606	ADP-ribosylation-like_factor_6_interacting_protein_4
ARL6IP5	AMPL28212035	2340	1521	ADP-ribosylation-like_factor_6_interacting_protein_5
ARL6IP6	AMPL34947858	1451	1367	ADP-ribosylation-like_factor_6_interacting_protein_6
ARL8A	AMPL35666655	433	257	ADP-ribosylation_factor-like_8A
ARL8B	AMPL31663942	3643	3055	ADP-ribosylation_factor-like_8B
ARL9	AMPL21658573	0	0	ADP-ribosylation_factor-like_9
ARMC1	AMPL33276668	1407	2203	armadillo_repeat_containing_1
ARMC10	AMPL6829494	607	451	armadillo_repeat_containing_10
ARMC12	AMPL34557040	28	5	armadillo_repeat_containing_12
ARMC2	AMPL15191221	9	12	armadillo_repeat_containing_2
ARMC3	AMPL16032656	8	4	armadillo_repeat_containing_3
ARMC4	AMPL32654015	1	1	armadillo_repeat_containing_4
ARMC5	AMPL1847634	87	36	armadillo_repeat_containing_5
ARMC6	AMPL17047893	207	120	armadillo_repeat_containing_6
ARMC7	AMPL15503578	264	182	armadillo_repeat_containing_7
ARMC8	AMPL26368799	491	352	armadillo_repeat_containing_8
ARMC9	AMPL14620103	358	263	armadillo_repeat_containing_9
ARMCX1	AMPL30572095	0	2	armadillo_repeat_containing__X-linked_1
ARMCX2	AMPL25060657	1	7	armadillo_repeat_containing__X-linked_2
ARMCX3	AMPL15636455	138	32	armadillo_repeat_containing__X-linked_3
ARMCX4	AMPL19442349	0	0	armadillo_repeat_containing__X-linked_4
ARMCX5	AMPL37262862	253	212	armadillo_repeat_containing__X-linked_5
ARMCX6	AMPL1879620	70	44	armadillo_repeat_containing__X-linked_6
ARMS2	AMPL5488259	0	0	age-related_maculopathy_susceptibility_2
ARNT	AMPL10772887	1449	724	aryl_hydrocarbon_receptor_nuclear_translocator
ARNT2	AMPL24544376	714	449	aryl-hydrocarbon_receptor_nuclear_translocator_2
ARNTL	AMPL10829423	345	267	aryl_hydrocarbon_receptor_nuclear_translocator-like
ARPC1A	AMPL27407675	1794	1966	actin_related_protein_2_3_complex__subunit_1A__41kDa
ARPC1B	AMPL26885652	1417	904	actin_related_protein_2_3_complex__subunit_1B__41kDa
ARPC2	AMPL34526283	8789	7343	actin_related_protein_2_3_complex__subunit_2__34kDa
ARPC3	AMPL28800417	7081	6562	actin_related_protein_2_3_complex__subunit_3__21kDa
ARPC5	AMPL28159272	2338	1360	actin_related_protein_2_3_complex__subunit_5__16kDa
ARPC5L	AMPL14557616	108	154	actin_related_protein_2_3_complex__subunit_5-like
ACTRT3	AMPL14535212	87	81	actin-related_protein_T3
ARPP19	AMPL13220289	2687	1536	cAMP-regulated_phosphoprotein__19kDa
ARPP21	AMPL33050645	0	0	cAMP-regulated_phosphoprotein__21kDa
ARR3	AMPL30412868	0	0	arrestin_3__retinal__X-arrestin
ARRB1	AMPL27367771	182	45	arrestin__beta_1
ARRB2	AMPL28277320	3325	1741	arrestin__beta_2
ARRDC1	AMPL35508520	546	167	arrestin_domain_containing_1
ARRDC2	AMPL31405804	458	222	arrestin_domain_containing_2
ARRDC3	AMPL36713306	662	168	arrestin_domain_containing_3
ARRDC4	AMPL21089735	26	11	arrestin_domain_containing_4
ARRDC5	AMPL2405718	1	0	arrestin_domain_containing_5
ARSA	AMPL2180051	223	111	arylsulfatase_A
ARSB	AMPL6633252	459	383	arylsulfatase_B
ARSD	AMPL10772805	308	146	arylsulfatase_D
ARSE	AMPL2885948	2547	1688	arylsulfatase_E__chondrodysplasia_punctata_1
ARSF	AMPL6842815	0	0	arylsulfatase_F
ARSG	AMPL26551075	0	0	arylsulfatase_G
ARSH	AMPL1443251	0	0	arylsulfatase_family__member_H
ARSI	AMPL214004	42	13	arylsulfatase_family__member_I
ARSJ	AMPL15560866	617	630	arylsulfatase_family__member_J
ARSK	AMPL22079507	192	131	arylsulfatase_family__member_K
ART1	AMPL27706531	0	0	ADP-ribosyltransferase_1
ART3	AMPL3134109	0	0	ADP-ribosyltransferase_3
ART4	AMPL36329504	1	0	ADP-ribosyltransferase_4__Dombrock_blood_group
ART5	AMPL17888669	1	0	ADP-ribosyltransferase_5
ARTN	AMPL1709769	0	0	artemin
ARV1	AMPL36287835	514	294	ARV1_homolog__S._cerevisiae
ARVCF	AMPL7928989	23	10	armadillo_repeat_gene_deleted_in_velocardiofacial_syndrome
ARX	AMPL35193310	100	29	aristaless_related_homeobox
AS3MT	AMPL32570187	104	160	arsenic__plus3_oxidation_state__methyltransferase
ASAH1	AMPL15720712	1068	823	N-acylsphingosine_amidohydrolase__acid_ceramidase__1
ASAH2	AMPL30679256	0	1	N-acylsphingosine_amidohydrolase__non-lysosomal_ceramidase__2
ASAH2B	AMPL2031959	134	82	N-acylsphingosine_amidohydrolase__non-lysosomal_ceramidase__2B
ASAP1	AMPL31080579	2429	3112	ArfGAP_with_SH3_domain__ankyrin_repeat_and_PH_domain_1
ASAP2	AMPL29550447	1746	746	ArfGAP_with_SH3_domain__ankyrin_repeat_and_PH_domain_2
ASAP3	AMPL31316932	147	40	ArfGAP_with_SH3_domain__ankyrin_repeat_and_PH_domain_3
ASB1	AMPL3698606	752	317	ankyrin_repeat_and_SOCS_box_containing_1
ASB10	AMPL18132119	1	0	ankyrin_repeat_and_SOCS_box_containing_10
ASB11	AMPL17222136	0	0	ankyrin_repeat_and_SOCS_box_containing_11
ASB13	AMPL14320134	149	38	ankyrin_repeat_and_SOCS_box_containing_13
ASB14	AMPL4634561	0	0	ankyrin_repeat_and_SOCS_box_containing_14
ASB15	AMPL18734859	0	0	ankyrin_repeat_and_SOCS_box_containing_15
ASB16	AMPL17013915	0	1	ankyrin_repeat_and_SOCS_box_containing_16
ASB17	AMPL18327707	0	0	ankyrin_repeat_and_SOCS_box_containing_17
ASB18	AMPL21450270	0	0	ankyrin_repeat_and_SOCS_box_containing_18
ASB2	AMPL7709803	0	0	ankyrin_repeat_and_SOCS_box_containing_2
ASB4	AMPL32752777	156	108	ankyrin_repeat_and_SOCS_box_containing_4
ASB5	AMPL17223398	0	0	ankyrin_repeat_and_SOCS_box_containing_5
ASB6	AMPL30768585	239	118	ankyrin_repeat_and_SOCS_box_containing_6
ASB7	AMPL21481015	262	151	ankyrin_repeat_and_SOCS_box_containing_7
ASB8	AMPL35372423	296	214	ankyrin_repeat_and_SOCS_box_containing_8
ASB9	AMPL186587	371	195	ankyrin_repeat_and_SOCS_box_containing_9
ASB9P1	AMPL38147377	10	4	ankyrin_repeat_and_SOCS_box_containing_9_pseudogene_1
ASCC1	AMPL11108897	200	111	activating_signal_cointegrator_1_complex_subunit_1
ASCC2	AMPL14259390	641	481	activating_signal_cointegrator_1_complex_subunit_2
ASCC3	AMPL12244696	952	1147	activating_signal_cointegrator_1_complex_subunit_3
ASCL1	AMPL29761144	0	0	achaete-scute_family_bHLH_transcription_factor_1
ASCL3	AMPL32898498	0	0	achaete-scute_family_bHLH_transcription_factor_3
ASCL4	AMPL20669284	0	0	achaete-scute_family_bHLH_transcription_factor_4
ASF1A	AMPL26276122	873	706	anti-silencing_function_1A_histone_chaperone
ASF1B	AMPL32091480	1322	712	anti-silencing_function_1B_histone_chaperone
ASGR1	AMPL9332211	106	29	asialoglycoprotein_receptor_1
ASGR2	AMPL17603959	0	0	asialoglycoprotein_receptor_2
ASH1L	AMPL31206101	646	417	ash1__absent__small__or_homeotic_-like__Drosophila
ASH2L	AMPL28271351	1101	728	ash2__absent__small__or_homeotic_-like__Drosophila
ASIP	AMPL10544583	0	0	agouti_signaling_protein
ASL	AMPL6632654	467	205	argininosuccinate_lyase
ASMT	AMPL8771915	2	1	acetylserotonin_O-methyltransferase
ASMTL	AMPL27358433	314	134	acetylserotonin_O-methyltransferase-like
ASNA1	AMPL28544459	1277	1665	arsA_arsenite_transporter__ATP-binding__homolog_1__bacterial
ASNS	AMPL9843667	687	912	asparagine_synthetase__glutamine-hydrolyzing
ASNSD1	AMPL33081423	320	206	asparagine_synthetase_domain_containing_1
ASPA	AMPL1434285	0	0	aspartoacylase
ASPDH	AMPL4726263	17	0	aspartate_dehydrogenase_domain_containing
ASPG	AMPL3946066	0	0	asparaginase_homolog__S._cerevisiae
ASPH	AMPL27252361	13444	8393	aspartate_beta-hydroxylase
ASPHD1	AMPL16662242	214	279	aspartate_beta-hydroxylase_domain_containing_1
ASPHD2	AMPL31266549	39	28	aspartate_beta-hydroxylase_domain_containing_2
ASPM	AMPL33832320	1358	1857	asp__abnormal_spindle__homolog__microcephaly_associated__Drosophila
ASPN	AMPL33841183	0	0	asporin
ASPRV1	AMPL35692259	7	4	aspartic_peptidase__retroviral-like_1
ASRGL1	AMPL4933137	87	103	asparaginase_like_1
ASS1	AMPL6466835	928	494	argininosuccinate_synthase_1
ASTE1	AMPL24581850	83	67	asteroid_homolog_1__Drosophila
ASTL	AMPL6590780	0	0	astacin-like_metallo-endopeptidase__M12_family
ASTN1	AMPL28805298	0	0	astrotactin_1
ASTN2	AMPL24176308	0	0	astrotactin_2
ASUN	AMPL32760458	981	810	asunder_spermatogenesis_regulator
ASXL1	AMPL26208743	548	228	additional_sex_combs_like_1__Drosophila
ASXL2	AMPL32857745	1328	628	additional_sex_combs_like_2__Drosophila
ASXL3	AMPL14175370	0	0	additional_sex_combs_like_3__Drosophila
ASZ1	AMPL17687967	0	0	ankyrin_repeat__SAM_and_basic_leucine_zipper_domain_containing_1
ATAD1	AMPL17191092	2693	2803	ATPase_family__AAA_domain_containing_1
ATAD2	AMPL24747882	869	579	ATPase_family__AAA_domain_containing_2
ATAD2B	AMPL31882683	136	135	ATPase_family__AAA_domain_containing_2B
ATAD3A	AMPL7172782	378	422	ATPase_family__AAA_domain_containing_3A
ATAD3B	AMPL15038699	0	0	ATPase_family__AAA_domain_containing_3B
ATAD3C	AMPL5771912	0	0	ATPase_family__AAA_domain_containing_3C
ATAD5	AMPL14523962	479	750	ATPase_family__AAA_domain_containing_5
ATAT1	AMPL480463	210	78	alpha_tubulin_acetyltransferase_1
ATCAY	AMPL15908336	0	0	ataxia__cerebellar__Cayman_type
ATE1	AMPL4883050	244	98	arginyltransferase_1
ATF1	AMPL27635169	451	332	activating_transcription_factor_1
ATF2	AMPL9105135	885	736	activating_transcription_factor_2
ATF3	AMPL8833416	57	550	activating_transcription_factor_3
ATF4	AMPL21733363	4084	2730	activating_transcription_factor_4
ATF5	AMPL6923378	602	413	activating_transcription_factor_5
ATF6	AMPL12390755	1441	1244	activating_transcription_factor_6
ATF6B	AMPL30097982	1956	531	activating_transcription_factor_6_beta
ATF7	AMPL13771318	477	128	activating_transcription_factor_7
ATF7IP	AMPL30857028	699	455	activating_transcription_factor_7_interacting_protein
ATF7IP2	AMPL15492487	98	69	activating_transcription_factor_7_interacting_protein_2
ATG10	AMPL13976646	780	715	autophagy_related_10
ATG12	AMPL29368688	974	1018	autophagy_related_12
ATG13	AMPL9296250	2	3	autophagy_related_13
ATG14	AMPL26554381	256	138	autophagy_related_14
ATG16L1	AMPL14171877	338	515	autophagy_related_16-like_1__S._cerevisiae
ATG16L2	AMPL16630410	77	19	autophagy_related_16-like_2__S._cerevisiae
ATG2A	AMPL25973472	1042	385	autophagy_related_2A
ATG2B	AMPL32664358	623	467	autophagy_related_2B
ATG3	AMPL36897033	1977	2375	autophagy_related_3
ATG4A	AMPL15781706	130	125	autophagy_related_4A__cysteine_peptidase
ATG4B	AMPL12666605	1385	764	autophagy_related_4B__cysteine_peptidase
ATG4C	AMPL16135292	310	300	autophagy_related_4C__cysteine_peptidase
ATG4D	AMPL18713091	46	14	autophagy_related_4D__cysteine_peptidase
ATG5	AMPL28988685	460	403	autophagy_related_5
ATG7	AMPL29912359	218	205	autophagy_related_7
ATG9A	AMPL36166240	1042	457	autophagy_related_9A
ATG9B	AMPL15588528	0	0	autophagy_related_9B
ATHL1	AMPL14576691	601	105	ATH1__acid_trehalase-like_1__yeast
ATIC	AMPL28300718	12589	13428	5-aminoimidazole-4-carboxamide_ribonucleotide_formyltransferase_IMP_cyclohydrolase
ATL1	AMPL4554437	34	31	atlastin_GTPase_1
ATL2	AMPL1514971	1315	1112	atlastin_GTPase_2
ATL3	AMPL26521017	1897	1636	atlastin_GTPase_3
ATM	AMPL2143252	326	278	ataxia_telangiectasia_mutated
ATMIN	AMPL25963022	893	1017	ATM_interactor
ATN1	AMPL231819	2106	742	atrophin_1
ATOH1	AMPL29934450	0	0	atonal_homolog_1__Drosophila
ATOH7	AMPL34498569	2	1	atonal_homolog_7__Drosophila
ATOH8	AMPL16234026	70	27	atonal_homolog_8__Drosophila
ATOX1	AMPL27958934	1670	824	antioxidant_1_copper_chaperone
ATP10A	AMPL35063510	219	157	ATPase__class_V__type_10A
ATP10B	AMPL13945502	0	0	ATPase__class_V__type_10B
ATP10D	AMPL30765845	75	86	ATPase__class_V__type_10D
ATP11A	AMPL15404511	568	263	ATPase__class_VI__type_11A
ATP11B	AMPL26431815	594	501	ATPase__class_VI__type_11B
ATP11C	AMPL16112492	896	853	ATPase__class_VI__type_11C
ATP12A	AMPL8457129	0	0	ATPase__H_K_transporting__nongastric__alpha_polypeptide
ATP13A1	AMPL30893851	395	196	ATPase_type_13A1
ATP13A2	AMPL36398782	252	119	ATPase_type_13A2
ATP13A3	AMPL35063244	1087	1287	ATPase_type_13A3
ATP13A4	AMPL14090937	1	2	ATPase_type_13A4
ATP13A5	AMPL21233091	0	0	ATPase_type_13A5
ATP1A1	AMPL6301966	8293	7412	ATPase__Na_K_transporting__alpha_1_polypeptide
ATP1A2	AMPL3201885	4	1	ATPase__Na_K_transporting__alpha_2_polypeptide
ATP1A3	AMPL34488415	141	35	ATPase__Na_K_transporting__alpha_3_polypeptide
ATP1A4	AMPL34408514	0	0	ATPase__Na_K_transporting__alpha_4_polypeptide
ATP1B1	AMPL10017631	12089	6613	ATPase__Na_K_transporting__beta_1_polypeptide
ATP1B2	AMPL11357252	2	3	ATPase__Na_K_transporting__beta_2_polypeptide
ATP1B3	AMPL8454601	2483	1755	ATPase__Na_K_transporting__beta_3_polypeptide
ATP1B4	AMPL1916229	0	0	ATPase__Na_K_transporting__beta_4_polypeptide
ATP2A1	AMPL17028828	46	11	ATPase__Ca_transporting__cardiac_muscle__fast_twitch_1
ATP2A2	AMPL17407313	9047	5508	ATPase__Ca_transporting__cardiac_muscle__slow_twitch_2
ATP2A3	AMPL18568179	97	29	ATPase__Ca_transporting__ubiquitous
ATP2B1	AMPL7539040	1852	1508	ATPase__Ca_transporting__plasma_membrane_1
ATP2B2	AMPL6492063	3	0	ATPase__Ca_transporting__plasma_membrane_2
ATP2B3	AMPL4403211	1	0	ATPase__Ca_transporting__plasma_membrane_3
ATP2B4	AMPL7734590	956	699	ATPase__Ca_transporting__plasma_membrane_4
ATP2C1	AMPL8402477	0	2	ATPase__Ca_transporting__type_2C__member_1
ATP2C2	AMPL25208833	3	1	ATPase__Ca_transporting__type_2C__member_2
ATP4A	AMPL5298477	2	0	ATPase__H_K_exchanging__alpha_polypeptide
ATP4B	AMPL3931512	0	0	ATPase__H_K_exchanging__beta_polypeptide
ATP5A1	AMPL27134628	5712	8280	ATP_synthase__H_transporting__mitochondrial_F1_complex__alpha_subunit_1__cardiac_muscle
ATP5B	AMPL7735358	15463	10176	ATP_synthase__H_transporting__mitochondrial_F1_complex__beta_polypeptide
ATP5C1	AMPL4531796	6012	4207	ATP_synthase__H_transporting__mitochondrial_F1_complex__gamma_polypeptide_1
ATP5D	AMPL9841063	1283	650	ATP_synthase__H_transporting__mitochondrial_F1_complex__delta_subunit
ATP5E	AMPL12406980	2138	1806	ATP_synthase__H_transporting__mitochondrial_F1_complex__epsilon_subunit
ATP5EP2	AMPL20787034	1	0	ATP_synthase__H_transporting__mitochondrial_F1_complex__epsilon_subunit_pseudogene_2
ATP5F1	AMPL7925295	1745	1247	ATP_synthase__H_transporting__mitochondrial_Fo_complex__subunit_B1
ATP5G1	AMPL3839339	2591	1427	ATP_synthase__H_transporting__mitochondrial_Fo_complex__subunit_C1__subunit_9
ATP5G2	AMPL27389631	10515	5275	ATP_synthase__H_transporting__mitochondrial_Fo_complex__subunit_C2__subunit_9
ATP5G3	AMPL5567273	4600	3875	ATP_synthase__H_transporting__mitochondrial_Fo_complex__subunit_C3__subunit_9
ATP5H	AMPL26855942	7377	4843	ATP_synthase__H_transporting__mitochondrial_Fo_complex__subunit_d
ATP5I	AMPL12072390	967	797	ATP_synthase__H_transporting__mitochondrial_Fo_complex__subunit_E
ATP5J	AMPL6212908	66	39	ATP_synthase__H_transporting__mitochondrial_Fo_complex__subunit_F6
ATP5L	AMPL30008040	8682	7782	ATP_synthase__H_transporting__mitochondrial_Fo_complex__subunit_G
ATP5L2	AMPL7525697	16	8	ATP_synthase__H_transporting__mitochondrial_Fo_complex__subunit_G2
ATP5S	AMPL1258338	303	152	ATP_synthase__H_transporting__mitochondrial_Fo_complex__subunit_s__factor_B
ATP5SL	AMPL32208922	2322	1278	ATP5S-like
ATP6AP1	AMPL10135869	2401	1252	ATPase__H_transporting__lysosomal_accessory_protein_1
ATP6AP1L	AMPL2189137	23	6	ATPase__H_transporting__lysosomal_accessory_protein_1-like
ATP6AP2	AMPL27457747	2848	1591	ATPase__H_transporting__lysosomal_accessory_protein_2
ATP6V0A1	AMPL2359872	1755	1210	ATPase__H_transporting__lysosomal_V0_subunit_a1
ATP6V0A2	AMPL12371425	161	221	ATPase__H_transporting__lysosomal_V0_subunit_a2
ATP6V0A4	AMPL17013120	9	5	ATPase__H_transporting__lysosomal_V0_subunit_a4
ATP6V0B	AMPL30169117	319	235	ATPase__H_transporting__lysosomal_21kDa__V0_subunit_b
ATP6V0C	AMPL9475998	4078	2893	ATPase__H_transporting__lysosomal_16kDa__V0_subunit_c
ATP6V0CP3	AMPL38090335	0	0	ATPase__H_transporting__lysosomal_16kDa__V0_subunit_c_pseudogene_3
ATP6V0D1	AMPL27551438	585	232	ATPase__H_transporting__lysosomal_38kDa__V0_subunit_d1
ATP6V0D2	AMPL36073894	0	0	ATPase__H_transporting__lysosomal_38kDa__V0_subunit_d2
ATP6V0E1	AMPL27842167	7436	5454	ATPase__H_transporting__lysosomal_9kDa__V0_subunit_e1
ATP6V0E2	AMPL5042125	255	201	ATPase__H_transporting_V0_subunit_e2
ATP6V1A	AMPL11720855	576	407	ATPase__H_transporting__lysosomal_70kDa__V1_subunit_A
ATP6V1B1	AMPL10351114	141	38	ATPase__H_transporting__lysosomal_56_58kDa__V1_subunit_B1
ATP6V1B2	AMPL11970867	1639	1703	ATPase__H_transporting__lysosomal_56_58kDa__V1_subunit_B2
ATP6V1C1	AMPL12028941	642	367	ATPase__H_transporting__lysosomal_42kDa__V1_subunit_C1
ATP6V1C2	AMPL3876842	0	0	ATPase__H_transporting__lysosomal_42kDa__V1_subunit_C2
ATP6V1D	AMPL31587339	1034	1017	ATPase__H_transporting__lysosomal_34kDa__V1_subunit_D
ATP6V1E1	AMPL7388751	1288	975	ATPase__H_transporting__lysosomal_31kDa__V1_subunit_E1
ATP6V1E2	AMPL17882911	48	43	ATPase__H_transporting__lysosomal_31kDa__V1_subunit_E2
ATP6V1F	AMPL8552207	27	11	ATPase__H_transporting__lysosomal_14kDa__V1_subunit_F
ATP6V1G1	AMPL27537257	2077	886	ATPase__H_transporting__lysosomal_13kDa__V1_subunit_G1
ATP6V1G2	AMPL16279078	26	8	ATPase__H_transporting__lysosomal_13kDa__V1_subunit_G2
ATP6V1G3	AMPL18236301	0	0	ATPase__H_transporting__lysosomal_13kDa__V1_subunit_G3
ATP6V1H	AMPL31049293	680	1096	ATPase__H_transporting__lysosomal_50_57kDa__V1_subunit_H
ATP7A	AMPL2873066	233	173	ATPase__Cu_transporting__alpha_polypeptide
ATP7B	AMPL4106034	96	29	ATPase__Cu_transporting__beta_polypeptide
ATP8A1	AMPL28863431	13	11	ATPase__aminophospholipid_transporter__APLT__class_I__type_8A__member_1
ATP8A2	AMPL32481507	0	0	ATPase__aminophospholipid_transporter__class_I__type_8A__member_2
ATP8B1	AMPL28264684	714	351	ATPase__aminophospholipid_transporter__class_I__type_8B__member_1
ATP8B2	AMPL31589836	764	315	ATPase__aminophospholipid_transporter__class_I__type_8B__member_2
ATP8B3	AMPL6649880	601	433	ATPase__aminophospholipid_transporter__class_I__type_8B__member_3
ATP8B4	AMPL14136232	10	9	ATPase__class_I__type_8B__member_4
ATP9A	AMPL27668277	408	164	ATPase__class_II__type_9A
ATP9B	AMPL21347970	70	32	ATPase__class_II__type_9B
ATPAF1	AMPL36835771	757	667	ATP_synthase_mitochondrial_F1_complex_assembly_factor_1
ATPAF2	AMPL34401893	355	162	ATP_synthase_mitochondrial_F1_complex_assembly_factor_2
ATPBD4	AMPL16290533	371	213	.
ATPIF1	AMPL31476099	1540	1736	ATPase_inhibitory_factor_1
ATR	AMPL6698211	374	487	ataxia_telangiectasia_and_Rad3_related
ATRIP	AMPL17518948	149	110	ATR_interacting_protein
ATRN	AMPL36499888	744	320	attractin
ATRNL1	AMPL21799547	10	16	,attractin-like_1
ATRX	AMPL3809384	743	540	alpha_thalassemia_mental_retardation_syndrome_X-linked
ATXN1	AMPL3483603	261	79	ataxin_1
ATXN10	AMPL13463058	2663	2548	ataxin_10
ATXN1L	AMPL3905892	926	371	ataxin_1-like
ATXN2	AMPL9990018	2433	1167	ataxin_2
ATXN2L	AMPL34974593	3321	1479	ataxin_2-like
ATXN3	AMPL29828939	518	431	ataxin_3
ATXN3L	AMPL3310533	0	0	ataxin_3-like
ATXN7	AMPL8587185	25	19	ataxin_7
ATXN7L1	AMPL32566527	125	71	ataxin_7-like_1
ATXN7L2	AMPL16055762	32	18	ataxin_7-like_2
ATXN7L3	AMPL32349558	1388	1015	ataxin_7-like_3
ATXN7L3B	AMPL3300200	1776	1031	ataxin_7-like_3B
ATXN8OS	AMPL20323017	0	0	ATXN8_opposite_strand__non-protein_coding
AUH	AMPL10011716	574	232	AU_RNA_binding_protein_enoyl-CoA_hydratase
AUP1	AMPL15689194	1690	1117	ancient_ubiquitous_protein_1
AURKA	AMPL8579453	264	342	aurora_kinase_A
AURKAIP1	AMPL3151115	2081	1676	aurora_kinase_A_interacting_protein_1
AURKAPS1	AMPL20356387	59	31	aurora_kinase_A_pseudogene_1
AURKB	AMPL29181444	466	318	aurora_kinase_B
AURKC	AMPL895837	4	1	aurora_kinase_C
AUTS2	AMPL30542403	94	26	autism_susceptibility_candidate_2
AVEN	AMPL32013332	292	321	apoptosis__caspase_activation_inhibitor
AVIL	AMPL12364490	35	3	advillin
AVL9	AMPL24456036	667	260	AVL9_homolog__S._cerevisiase
AVP	AMPL1673743	0	0	arginine_vasopressin
AVPI1	AMPL37013334	841	503	arginine_vasopressin-induced_1
AVPR1A	AMPL6407827	1	1	arginine_vasopressin_receptor_1A
AVPR1B	AMPL3924433	0	0	arginine_vasopressin_receptor_1B
AVPR2	AMPL4828297	1	0	arginine_vasopressin_receptor_2
AWAT1	AMPL428977	0	0	acyl-CoA_wax_alcohol_acyltransferase_1
AWAT2	AMPL2961406	0	0	acyl-CoA_wax_alcohol_acyltransferase_2
AXDND1	AMPL34263616	1	0	axonemal_dynein_light_chain_domain_containing_1
AXIN1	AMPL11607174	290	164	axin_1
AXIN2	AMPL28369574	190	94	axin_2
AXL	AMPL37228762	439	397	AXL_receptor_tyrosine_kinase
AZGP1	AMPL7466291	4	1	alpha-2-glycoprotein_1__zinc-binding
AZI1	AMPL26408078	163	71	5-azacytidine_induced_1
AZI2	AMPL35511932	342	286	5-azacytidine_induced_2
AZIN1	AMPL34779244	2525	2842	antizyme_inhibitor_1
AZU1	AMPL10539900	14	1	azurocidin_1
B2M	AMPL30482794	4346	3461	beta-2-microglobulin
B3GALNT1	AMPL15797768	0	1	beta-1_3-N-acetylgalactosaminyltransferase_1__globoside_blood_group
B3GALNT2	AMPL34241218	1005	1050	beta-1_3-N-acetylgalactosaminyltransferase_2
B3GALT1	AMPL37342084	3	0	UDP-Gal_betaGlcNAc_beta_1_3-galactosyltransferase__polypeptide_1
B3GALT2	AMPL7509998	0	0	UDP-Gal_betaGlcNAc_beta_1_3-galactosyltransferase__polypeptide_2
B3GALT4	AMPL10238414	16	6	UDP-Gal_betaGlcNAc_beta_1_3-galactosyltransferase__polypeptide_4
B3GALT5	AMPL18007465	7	6	UDP-Gal_betaGlcNAc_beta_1_3-galactosyltransferase__polypeptide_5
B3GALT6	AMPL16079013	747	423	UDP-Gal_betaGal_beta_1_3-galactosyltransferase_polypeptide_6
B3GALTL	AMPL21533880	118	104	beta_1_3-galactosyltransferase-like
B3GAT1	AMPL30703334	0	0	beta-1_3-glucuronyltransferase_1__glucuronosyltransferase_P
B3GAT2	AMPL17226163	0	0	beta-1_3-glucuronyltransferase_2__glucuronosyltransferase_S
B3GAT3	AMPL12116217	381	118	beta-1_3-glucuronyltransferase_3__glucuronosyltransferase_I
B3GNT1	AMPL13441321	162	82	UDP-GlcNAc_betaGal_beta-1_3-N-acetylglucosaminyltransferase_1
B3GNT2	AMPL12253190	314	246	UDP-GlcNAc_betaGal_beta-1_3-N-acetylglucosaminyltransferase_2
B3GNT3	AMPL24577547	231	197	UDP-GlcNAc_betaGal_beta-1_3-N-acetylglucosaminyltransferase_3
B3GNT4	AMPL14463187	1	0	UDP-GlcNAc_betaGal_beta-1_3-N-acetylglucosaminyltransferase_4
B3GNT5	AMPL15516974	141	133	UDP-GlcNAc_betaGal_beta-1_3-N-acetylglucosaminyltransferase_5
B3GNT6	AMPL34329418	8	0	UDP-GlcNAc_betaGal_beta-1_3-N-acetylglucosaminyltransferase_6__core_3_synthase
B3GNT8	AMPL20955300	0	0	UDP-GlcNAc_betaGal_beta-1_3-N-acetylglucosaminyltransferase_8
B3GNTL1	AMPL336506	151	92	UDP-GlcNAc_betaGal_beta-1_3-N-acetylglucosaminyltransferase-like_1
B4GALNT1	AMPL9690786	529	280	beta-1_4-N-acetyl-galactosaminyl_transferase_1
B4GALNT2	AMPL18613346	3	2	beta-1_4-N-acetyl-galactosaminyl_transferase_2
B4GALNT3	AMPL16836352	21	11	beta-1_4-N-acetyl-galactosaminyl_transferase_3
B4GALNT4	AMPL15628054	332	130	beta-1_4-N-acetyl-galactosaminyl_transferase_4
B4GALT1	AMPL9350556	5645	3187	UDP-Gal_betaGlcNAc_beta_1_4-_galactosyltransferase__polypeptide_1
B4GALT2	AMPL14510818	710	354	UDP-Gal_betaGlcNAc_beta_1_4-_galactosyltransferase__polypeptide_2
B4GALT3	AMPL9617188	694	615	UDP-Gal_betaGlcNAc_beta_1_4-_galactosyltransferase__polypeptide_3
B4GALT4	AMPL10696299	2479	2858	UDP-Gal_betaGlcNAc_beta_1_4-_galactosyltransferase__polypeptide_4
B4GALT5	AMPL27658182	2297	1214	UDP-Gal_betaGlcNAc_beta_1_4-_galactosyltransferase__polypeptide_5
B4GALT6	AMPL27891146	272	210	UDP-Gal_betaGlcNAc_beta_1_4-_galactosyltransferase__polypeptide_6
B4GALT7	AMPL12569237	139	56	xylosylprotein_beta_1_4-galactosyltransferase__polypeptide_7
NCR3LG1	AMPL9765840	86	54	natural_killer_cell_cytotoxicity_receptor_3_ligand_1
B9D1	AMPL32076205	1253	1082	B9_protein_domain_1
B9D2	AMPL15049595	188	137	B9_protein_domain_2
BAALC	AMPL14911573	0	0	brain_and_acute_leukemia__cytoplasmic
BAAT	AMPL4868327	631	543	bile_acid_CoA__amino_acid_N-acyltransferase__glycine_N-choloyltransferase
BABAM1	AMPL579311	771	517	BRISC_and_BRCA1_A_complex_member_1
BACE1	AMPL13239343	250	166	beta-site_APP-cleaving_enzyme_1
BACE2	AMPL12170220	885	668	beta-site_APP-cleaving_enzyme_2
BACH1	AMPL7297566	202	189	BTB_and_CNC_homology_1__basic_leucine_zipper_transcription_factor_1
BACH2	AMPL11008939	1	1	BTB_and_CNC_homology_1__basic_leucine_zipper_transcription_factor_2
BAD	AMPL15908493	1204	603	BCL2-associated_agonist_of_cell_death
BAG1	AMPL10525775	803	732	BCL2-associated_athanogene
BAG2	AMPL28664706	647	489	BCL2-associated_athanogene_2
BAG3	AMPL27594140	3351	2172	BCL2-associated_athanogene_3
BAG4	AMPL29711428	675	371	BCL2-associated_athanogene_4
BAG5	AMPL2517198	1	12	BCL2-associated_athanogene_5
BAG6	AMPL5218925	1252	462	BCL2-associated_athanogene_6
BAHCC1	AMPL3009659	275	111	BAH_domain_and_coiled-coil_containing_1
BAHD1	AMPL24976517	262	73	bromo_adjacent_homology_domain_containing_1
BAI1	AMPL9133379	44	6	brain-specific_angiogenesis_inhibitor_1
BAI2	AMPL8950354	240	82	brain-specific_angiogenesis_inhibitor_2
BAI3	AMPL7540943	8	10	brain-specific_angiogenesis_inhibitor_3
BAIAP2	AMPL30670348	749	471	BAI1-associated_protein_2
BAIAP2L1	AMPL34112411	2591	2315	BAI1-associated_protein_2-like_1
BAIAP2L2	AMPL14306064	261	103	BAI1-associated_protein_2-like_2
BAIAP3	AMPL30427888	39	3	BAI1-associated_protein_3
BAK1	AMPL9492945	337	140	BCL2-antagonist_killer_1
BAMBI	AMPL13466340	627	489	BMP_and_activin_membrane-bound_inhibitor
BANF1	AMPL3577633	1057	913	barrier_to_autointegration_factor_1
BANF2	AMPL6775206	0	0	barrier_to_autointegration_factor_2
BANK1	AMPL33210918	53	28	B-cell_scaffold_protein_with_ankyrin_repeats_1
BANP	AMPL10680813	255	197	BTG3_associated_nuclear_protein
BAP1	AMPL29370657	1287	840	BRCA1_associated_protein-1__ubiquitin_carboxy-terminal_hydrolase
BARD1	AMPL1683293	281	172	BRCA1_associated_RING_domain_1
BARHL1	AMPL33065351	0	0	BarH-like_homeobox_1
BARHL2	AMPL32482820	0	0	BarH-like_homeobox_2
BARX1	AMPL36208892	306	131	BARX_homeobox_1
BARX2	AMPL7534746	0	0	BARX_homeobox_2
BASP1	AMPL29813536	334	213	brain_abundant__membrane_attached_signal_protein_1
BASP1P1	AMPL37902188	0	0	brain_abundant__membrane_attached_signal_protein_1_pseudogene_1
BATF	AMPL27185055	0	1	basic_leucine_zipper_transcription_factor__ATF-like
BATF2	AMPL35884740	1	0	basic_leucine_zipper_transcription_factor__ATF-like_2
BATF3	AMPL33096990	64	40	basic_leucine_zipper_transcription_factor__ATF-like_3
BAX	AMPL27247904	2751	1515	BCL2-associated_X_protein
BAZ1A	AMPL24499766	570	534	bromodomain_adjacent_to_zinc_finger_domain__1A
BAZ1B	AMPL14332293	591	488	bromodomain_adjacent_to_zinc_finger_domain__1B
BAZ2A	AMPL25441352	1719	1052	bromodomain_adjacent_to_zinc_finger_domain__2A
BAZ2B	AMPL24178049	263	256	bromodomain_adjacent_to_zinc_finger_domain__2B
BBC3	AMPL2181983	95	46	BCL2_binding_component_3
BBOX1	AMPL30292079	0	0	butyrobetaine__gamma__2-oxoglutarate_dioxygenase__gamma-butyrobetaine_hydroxylase__1
BBS1	AMPL14965729	248	75	Bardet-Biedl_syndrome_1
BBS10	AMPL14743561	64	59	Bardet-Biedl_syndrome_10
BBS12	AMPL34935035	109	39	Bardet-Biedl_syndrome_12
BBS2	AMPL14346673	1084	768	Bardet-Biedl_syndrome_2
BBS4	AMPL17079302	733	503	Bardet-Biedl_syndrome_4
BBS7	AMPL15996215	177	138	Bardet-Biedl_syndrome_7
BBS9	AMPL20765352	259	130	Bardet-Biedl_syndrome_9
BBX	AMPL3420906	3011	2914	bobby_sox_homolog__Drosophila
BCAM	AMPL28886970	1887	264	basal_cell_adhesion_molecule__Lutheran_blood_group
BCAN	AMPL35430179	1	0	brevican
BCAP29	AMPL923319	793	933	B-cell_receptor-associated_protein_29
BCAP31	AMPL4072559	227	209	B-cell_receptor-associated_protein_31
BCAR1	AMPL6758195	5	0	breast_cancer_anti-estrogen_resistance_1
BCAR3	AMPL8396961	339	216	breast_cancer_anti-estrogen_resistance_3
BCAS1	AMPL9736184	144	68	breast_carcinoma_amplified_sequence_1
BCAS2	AMPL27568364	1060	836	breast_carcinoma_amplified_sequence_2
BCAS3	AMPL2555332	1077	402	breast_carcinoma_amplified_sequence_3
BCAS4	AMPL31183399	231	115	breast_carcinoma_amplified_sequence_4
BCAT1	AMPL6751055	261	676	branched_chain_amino-acid_transaminase_1__cytosolic
BCAT2	AMPL7293796	3281	1928	branched_chain_amino-acid_transaminase_2__mitochondrial
BCCIP	AMPL16466412	2729	3362	BRCA2_and_CDKN1A_interacting_protein
BCDIN3D	AMPL18141277	66	46	BCDIN3_domain_containing
BCHE	AMPL5334700	379	245	butyrylcholinesterase
BCKDHA	AMPL2105181	1287	205	branched_chain_keto_acid_dehydrogenase_E1__alpha_polypeptide
BCKDHB	AMPL21488680	307	152	branched_chain_keto_acid_dehydrogenase_E1__beta_polypeptide
BCKDK	AMPL27912012	1339	945	branched_chain_ketoacid_dehydrogenase_kinase
BCL10	AMPL27731761	231	312	B-cell_CLL_lymphoma_10
BCL11A	AMPL36060596	15	1	B-cell_CLL_lymphoma_11A__zinc_finger_protein
BCL11B	AMPL35299819	65	15	B-cell_CLL_lymphoma_11B__zinc_finger_protein
BCL2	AMPL1657954	11	4	B-cell_CLL_lymphoma_2
BCL2A1	AMPL30109688	99	216	BCL2-related_protein_A1
BCL2L1	AMPL34523885	7453	4539	BCL2-like_1
BCL2L10	AMPL32679360	0	1	BCL2-like_10__apoptosis_facilitator
BCL2L11	AMPL35298768	249	144	BCL2-like_11__apoptosis_facilitator
BCL2L12	AMPL35020671	1638	1328	BCL2-like_12__proline_rich
BCL2L13	AMPL24595191	219	100	BCL2-like_13__apoptosis_facilitator
BCL2L14	AMPL34825129	2	0	BCL2-like_14__apoptosis_facilitator
BCL2L15	AMPL34850	32	18	BCL2-like_15
BCL3	AMPL30061620	650	131	B-cell_CLL_lymphoma_3
BCL6	AMPL8265813	490	194	B-cell_CLL_lymphoma_6
BCL6B	AMPL21736954	1	0	B-cell_CLL_lymphoma_6__member_B
BCL7A	AMPL37021968	141	146	B-cell_CLL_lymphoma_7A
BCL7B	AMPL7729634	234	121	B-cell_CLL_lymphoma_7B
BCL7C	AMPL29714919	335	102	B-cell_CLL_lymphoma_7C
BCL9	AMPL28542096	242	140	B-cell_CLL_lymphoma_9
BCL9L	AMPL21735451	1330	487	B-cell_CLL_lymphoma_9-like
BCLAF1	AMPL26493561	1621	2088	BCL2-associated_transcription_factor_1
BCMO1	AMPL30997824	167	164	beta-carotene_15_15p-monooxygenase_1
BCO2	AMPL14342549	13	3	beta-carotene_oxygenase_2
BCOR	AMPL1804103	1547	1201	BCL6_corepressor
BCORL1	AMPL36541905	20	20	BCL6_corepressor-like_1
BCR	AMPL29511300	315	116	breakpoint_cluster_region
BCRP2	AMPL37985037	14	3	breakpoint_cluster_region_pseudogene_2
BCRP3	AMPL18920623	273	206	breakpoint_cluster_region_pseudogene_3
BCS1L	AMPL1829917	840	659	BC1__ubiquinol-cytochrome_c_reductase__synthesis-like
BDH1	AMPL29191676	228	158	3-hydroxybutyrate_dehydrogenase__type_1
BDH2	AMPL31496028	176	68	3-hydroxybutyrate_dehydrogenase__type_2
BDKRB1	AMPL3198562	154	47	bradykinin_receptor_B1
BDKRB2	AMPL6143285	352	135	bradykinin_receptor_B2
BDNF	AMPL1453729	0	0	brain-derived_neurotrophic_factor
BDP1	AMPL31213524	499	461	B_double_prime_1__subunit_of_RNA_polymerase_III_transcription_initiation_factor_IIIB
BEAN1	AMPL7049681	22	1	brain_expressed__associated_with_NEDD4__1
BECN1	AMPL7879720	1688	1271	beclin_1__autophagy_related
BEGAIN	AMPL7097789	11	4	brain-enriched_guanylate_kinase-associated
BEND2	AMPL17059880	0	0	BEN_domain_containing_2
BEND3	AMPL4394758	69	47	BEN_domain_containing_3
BEND4	AMPL21197452	1	0	BEN_domain_containing_4
BEND5	AMPL13862916	0	0	BEN_domain_containing_5
BEND6	AMPL34531721	15	34	BEN_domain_containing_6
BEND7	AMPL34679158	0	0	BEN_domain_containing_7
BEST1	AMPL29416952	8	1	bestrophin_1
BEST2	AMPL30556879	0	1	bestrophin_2
BEST3	AMPL17389459	0	0	bestrophin_3
BEST4	AMPL15956411	7	1	bestrophin_4
BET1	AMPL28699244	1800	1621	Bet1_golgi_vesicular_membrane_trafficking_protein
BET1L	AMPL5494216	911	496	Bet1_golgi_vesicular_membrane_trafficking_protein-like
BET3L	AMPL5263839	0	0	.
BEX1	AMPL34123974	65	105	brain_expressed__X-linked_1
BEX2	AMPL9688636	7	2	brain_expressed_X-linked_2
BEX4	AMPL5170496	9	2	brain_expressed__X-linked_4
BEX5	AMPL811233	0	0	brain_expressed__X-linked_5
BFAR	AMPL31903709	1933	1233	bifunctional_apoptosis_regulator
BFSP1	AMPL9186631	132	63	beaded_filament_structural_protein_1__filensin
BFSP2	AMPL9103167	0	0	beaded_filament_structural_protein_2__phakinin
BGLAP	AMPL21969314	65	33	bone_gamma-carboxyglutamate__gla__protein
BGN	AMPL7922279	0	0	biglycan
BHLHA15	AMPL16500793	4	3	basic_helix-loop-helix_family__member_a15
BHLHB9	AMPL2726896	0	1	basic_helix-loop-helix_domain_containing__class_B__9
BHLHE22	AMPL35360944	0	0	basic_helix-loop-helix_family__member_e22
BHLHE23	AMPL16071555	0	0	basic_helix-loop-helix_family__member_e23
BHLHE40	AMPL8382454	8571	13886	basic_helix-loop-helix_family__member_e40
BHLHE41	AMPL14782731	6	3	basic_helix-loop-helix_family__member_e41
BHMT	AMPL7922995	0	1	betaine--homocysteine_S-methyltransferase
BHMT2	AMPL31103090	0	0	betaine--homocysteine_S-methyltransferase_2
BICC1	AMPL1090847	2306	1332	bicaudal_C_homolog_1__Drosophila
BICD1	AMPL7727200	13	21	bicaudal_D_homolog_1__Drosophila
BICD2	AMPL3827039	661	477	bicaudal_D_homolog_2__Drosophila
BIK	AMPL6916083	19	12	BCL2-interacting_killer__apoptosis-inducing
BIN1	AMPL34417923	29	22	bridging_integrator_1
BIN2	AMPL33882547	0	1	bridging_integrator_2
BIN3	AMPL32055735	498	478	bridging_integrator_3
BIRC2	AMPL7341368	954	1176	baculoviral_IAP_repeat_containing_2
BIRC3	AMPL21443991	454	386	baculoviral_IAP_repeat_containing_3
BIRC5	AMPL513992	2411	2183	baculoviral_IAP_repeat_containing_5
BIRC6	AMPL30715760	1109	968	baculoviral_IAP_repeat_containing_6
BIRC7	AMPL36043180	56	13	baculoviral_IAP_repeat_containing_7
BIRC8	AMPL16017594	0	0	baculoviral_IAP_repeat_containing_8
BLCAP	AMPL9080507	2	1	bladder_cancer_associated_protein
BLID	AMPL4721220	33	9	BH3-like_motif_containing__cell_death_inducer
BLK	AMPL8795935	0	0	B_lymphoid_tyrosine_kinase
BLM	AMPL6166640	424	374	Bloom_syndrome__RecQ_helicase-like
BLMH	AMPL4672844	1554	2174	bleomycin_hydrolase
BLNK	AMPL12484544	0	0	B-cell_linker
BLOC1S1	AMPL10961039	609	318	biogenesis_of_lysosomal_organelles_complex-1__subunit_1
BLOC1S2	AMPL18002160	907	1123	biogenesis_of_lysosomal_organelles_complex-1__subunit_2
BLOC1S3	AMPL21387677	59	19	biogenesis_of_lysosomal_organelles_complex-1__subunit_3
BLVRA	AMPL6510549	2194	1314	biliverdin_reductase_A
BLVRB	AMPL6566042	7124	2492	biliverdin_reductase_B__flavin_reductase__NADPH
BLZF1	AMPL10868905	700	875	basic_leucine_zipper_nuclear_factor_1
BMF	AMPL3272455	93	13	Bcl2_modifying_factor
BMP1	AMPL28858758	526	215	bone_morphogenetic_protein_1
BMP10	AMPL24239314	0	0	bone_morphogenetic_protein_10
BMP15	AMPL28389151	0	0	bone_morphogenetic_protein_15
BMP2	AMPL9768078	8	4	bone_morphogenetic_protein_2
BMP2K	AMPL21060608	394	311	BMP2_inducible_kinase
BMP3	AMPL11088380	0	0	bone_morphogenetic_protein_3
BMP4	AMPL16912175	344	177	bone_morphogenetic_protein_4
BMP5	AMPL37404936	4	3	bone_morphogenetic_protein_5
BMP6	AMPL10007442	531	75	bone_morphogenetic_protein_6
BMP7	AMPL11468231	36	14	bone_morphogenetic_protein_7
BMP8A	AMPL22360745	11	1	bone_morphogenetic_protein_8a
BMP8B	AMPL11591448	181	57	bone_morphogenetic_protein_8b
BMPER	AMPL16439258	78	117	BMP_binding_endothelial_regulator
BMPR1A	AMPL29763544	776	699	bone_morphogenetic_protein_receptor__type_IA
BMPR1B	AMPL10925209	562	415	bone_morphogenetic_protein_receptor__type_IB
BMPR2	AMPL8843125	1514	1330	bone_morphogenetic_protein_receptor__type_II__serine_threonine_kinase
BMS1	AMPL24810319	1270	1002	BMS1_ribosome_biogenesis_factor
BMX	AMPL21514277	0	0	BMX_non-receptor_tyrosine_kinase
BNC1	AMPL9509379	1	2	basonuclin_1
BNC2	AMPL32683621	92	132	basonuclin_2
BNIP1	AMPL7018852	211	169	BCL2_adenovirus_E1B_19kDa_interacting_protein_1
BNIP2	AMPL27812423	1636	1447	BCL2_adenovirus_E1B_19kDa_interacting_protein_2
BNIP3	AMPL28439089	5925	5859	BCL2_adenovirus_E1B_19kDa_interacting_protein_3
BNIP3L	AMPL29408183	4414	1283	BCL2_adenovirus_E1B_19kDa_interacting_protein_3-like
BNIPL	AMPL15941113	3	8	BCL2_adenovirus_E1B_19kD_interacting_protein_like
BOC	AMPL17362522	45	19	BOC_cell_adhesion_associated__oncogene_regulated
BOD1	AMPL18670603	1256	1061	biorientation_of_chromosomes_in_cell_division_1
BOD1L1	AMPL34651382	317	218	biorientation_of_chromosomes_in_cell_division_1-like_1
BOK	AMPL15127679	20	8	BCL2-related_ovarian_killer
BOLA1	AMPL32162274	81	30	bolA_family_member_1
BOLA2B	AMPL289733	1908	1424	bolA_family_member_2B
BOLA3	AMPL21948598	2179	2436	bolA_family_member_3
BOLL	AMPL22292975	0	0	boule-like_RNA-binding_protein
BOP1	AMPL24694333	994	959	block_of_proliferation_1
BORA	AMPL14740474	166	224	bora__aurora_kinase_A_activator
BPGM	AMPL8794252	182	188	2_3-bisphosphoglycerate_mutase
BPHL	AMPL27120599	340	241	biphenyl_hydrolase-like__serine_hydrolase
BPI	AMPL7725712	0	0	bactericidal_permeability-increasing_protein
BPIFA2	AMPL16582359	0	0	BPI_fold_containing_family_A__member_2
BPIFA3	AMPL17578944	0	0	BPI_fold_containing_family_A__member_3
BPIFA4P	AMPL18769880	0	0	BPI_fold_containing_family_A__member_4__pseudogene
BPIFB1	AMPL17739284	2	1	BPI_fold_containing_family_B__member_1
BPIFB2	AMPL14466074	1	0	BPI_fold_containing_family_B__member_2
BPIFB3	AMPL21786684	0	0	BPI_fold_containing_family_B__member_3
BPIFB4	AMPL21696576	0	0	BPI_fold_containing_family_B__member_4
BPIFB6	AMPL16614853	0	0	BPI_fold_containing_family_B__member_6
BPIFC	AMPL16825716	0	0	BPI_fold_containing_family_C
BPNT1	AMPL28241162	226	321	3p_2p__5p-bisphosphate_nucleotidase_1
BPTF	AMPL20912626	1539	591	bromodomain_PHD_finger_transcription_factor
BRAF	AMPL28552085	627	600	v-raf_murine_sarcoma_viral_oncogene_homolog_B
BRAP	AMPL12144920	809	796	BRCA1_associated_protein
BRAT1	AMPL36055770	1180	757	BRCA1-associated_ATM_activator_1
BRCA1	AMPL12122958	673	560	breast_cancer_1__early_onset
BRCA2	AMPL6315908	268	233	breast_cancer_2__early_onset
BRCC3	AMPL35069100	62	44	BRCA1_BRCA2-containing_complex__subunit_3
BRD1	AMPL24651789	380	111	bromodomain_containing_1
BRD2	AMPL8222729	1168	1059	bromodomain_containing_2
BRD3	AMPL13003701	1416	1103	bromodomain_containing_3
BRD4	AMPL17127188	3135	1970	bromodomain_containing_4
BRD7	AMPL9820832	1255	1008	bromodomain_containing_7
BRD8	AMPL34569646	4	5	bromodomain_containing_8
BRD9	AMPL37424725	528	561	bromodomain_containing_9
BRDT	AMPL11970280	0	0	bromodomain__testis-specific
BRE	AMPL30502919	33	17	brain_and_reproductive_organ-expressed__TNFRSF1A_modulator
BREA2	AMPL20002384	2	1	.
BRF1	AMPL10562008	135	71	BRF1__RNA_polymerase_III_transcription_initiation_factor_90_kDa_subunit
BRF2	AMPL33255627	214	108	BRF2__RNA_polymerase_III_transcription_initiation_factor_50_kDa_subunit
BRI3	AMPL26370725	2723	967	brain_protein_I3
BRI3BP	AMPL17881715	1134	977	BRI3_binding_protein
BRIP1	AMPL14267024	279	167	BRCA1_interacting_protein_C-terminal_helicase_1
BRIX1	AMPL32526903	1453	2164	BRX1__biogenesis_of_ribosomes__homolog__S._cerevisiae
BRK1	AMPL32975697	3748	2239	BRICK1__SCAR_WAVE_actin-nucleating_complex_subunit
BRMS1	AMPL966743	745	591	breast_cancer_metastasis_suppressor_1
BRMS1L	AMPL14870155	251	224	breast_cancer_metastasis-suppressor_1-like
BROX	AMPL35088915	624	713	BRO1_domain_and_CAAX_motif_containing
MPC2	AMPL3405558	2304	2332	mitochondrial_pyruvate_carrier_2
MPC1	AMPL32515942	237	169	mitochondrial_pyruvate_carrier_1
BRPF1	AMPL3480999	145	80	bromodomain_and_PHD_finger_containing__1
BRPF3	AMPL32643654	217	155	bromodomain_and_PHD_finger_containing__3
BRS3	AMPL10767731	0	3	bombesin-like_receptor_3
BRSK1	AMPL15180472	167	62	BR_serine_threonine_kinase_1
BRSK2	AMPL27141979	194	81	BR_serine_threonine_kinase_2
BRWD1	AMPL32052540	1006	1156	bromodomain_and_WD_repeat_domain_containing_1
BRWD3	AMPL16871593	311	219	bromodomain_and_WD_repeat_domain_containing_3
BSCL2	AMPL6251216	1064	558	Berardinelli-Seip_congenital_lipodystrophy_2__seipin
BSDC1	AMPL32775368	499	157	BSD_domain_containing_1
BSG	AMPL8262523	16299	6026	basigin__Ok_blood_group
BSN	AMPL7742810	3	5	bassoon_presynaptic_cytomatrix_protein
BSND	AMPL16088696	0	0	Bartter_syndrome__infantile__with_sensorineural_deafness__Barttin
BSPH1	AMPL4549775	0	0	binder_of_sperm_protein_homolog_1
BSPRY	AMPL34054682	0	0	B-box_and_SPRY_domain_containing
BST1	AMPL29168482	79	48	bone_marrow_stromal_cell_antigen_1
BST2	AMPL28071836	14	67	bone_marrow_stromal_cell_antigen_2
BSX	AMPL3269069	0	0	brain-specific_homeobox
BTAF1	AMPL27966214	709	647	BTAF1_RNA_polymerase_II__B-TFIID_transcription_factor-associated__170kDa
BTBD1	AMPL13989580	3548	4889	BTB__POZ__domain_containing_1
BTBD10	AMPL13868861	593	568	BTB__POZ__domain_containing_10
BTBD11	AMPL694885	453	244	BTB__POZ__domain_containing_11
BTBD16	AMPL34372169	65	20	BTB__POZ__domain_containing_16
BTBD17	AMPL5106972	0	0	BTB__POZ__domain_containing_17
BTBD18	AMPL4783212	0	0	BTB__POZ__domain_containing_18
BTBD19	AMPL4659110	56	15	BTB__POZ__domain_containing_19
BTBD2	AMPL30553562	2962	1667	BTB__POZ__domain_containing_2
BTBD3	AMPL24391346	632	599	BTB__POZ__domain_containing_3
BTBD6	AMPL17273422	293	251	BTB__POZ__domain_containing_6
BTBD7	AMPL3292799	816	475	BTB__POZ__domain_containing_7
BTBD8	AMPL22177473	100	66	BTB__POZ__domain_containing_8
BTBD9	AMPL3771959	186	186	BTB__POZ__domain_containing_9
BTC	AMPL8086898	52	40	betacellulin
BTD	AMPL4823145	542	363	biotinidase
BTF3	AMPL5024000	11289	11539	basic_transcription_factor_3
BTF3L4	AMPL34965217	599	525	basic_transcription_factor_3-like_4
BTF3P11	AMPL19279352	0	1	basic_transcription_factor_3_pseudogene_11
BTG1	AMPL8948727	3359	1831	B-cell_translocation_gene_1__anti-proliferative
BTG2	AMPL13497337	132	87	BTG_family__member_2
BTG3	AMPL12805067	245	308	BTG_family__member_3
BTG4	AMPL32688315	1	2	B-cell_translocation_gene_4
BTK	AMPL5002405	0	0	Bruton_agammaglobulinemia_tyrosine_kinase
BTLA	AMPL21738305	0	0	B_and_T_lymphocyte_associated
BTN1A1	AMPL9127145	0	0	butyrophilin__subfamily_1__member_A1
BTN2A1	AMPL13491496	606	470	butyrophilin__subfamily_2__member_A1
BTN2A2	AMPL13255984	183	89	butyrophilin__subfamily_2__member_A2
BTN3A1	AMPL12641692	110	79	butyrophilin__subfamily_3__member_A1
BTN3A2	AMPL10477530	123	82	butyrophilin__subfamily_3__member_A2
BTN3A3	AMPL13200053	40	40	butyrophilin__subfamily_3__member_A3
BTNL2	AMPL33341286	0	0	butyrophilin-like_2__MHC_class_II_associated
BTNL3	AMPL21483486	0	0	butyrophilin-like_3
BTNL8	AMPL1317886	0	0	butyrophilin-like_8
BTNL9	AMPL36253728	0	0	butyrophilin-like_9
BTRC	AMPL18072155	511	338	beta-transducin_repeat_containing_E3_ubiquitin_protein_ligase
BUB1	AMPL29290680	2052	3586	BUB1_mitotic_checkpoint_serine_threonine_kinase
BUB1B	AMPL10744784	1236	1152	BUB1_mitotic_checkpoint_serine_threonine_kinase_B
BUB3	AMPL27323746	4182	3540	BUB3_mitotic_checkpoint_protein
BUD13	AMPL15734821	172	92	BUD13_homolog__S._cerevisiae
BUD31	AMPL29440141	1491	1640	BUD31_homolog__S._cerevisiae
BVES	AMPL12131969	144	132	blood_vessel_epicardial_substance
BYSL	AMPL27488485	242	338	bystin-like
BZRAP1	AMPL28260999	1	1	benzodiazepine_receptor__peripheral__associated_protein_1
BZW1	AMPL7010154	7150	7755	basic_leucine_zipper_and_W2_domains_1
BZW2	AMPL26195470	2881	2815	basic_leucine_zipper_and_W2_domains_2
C10orf10	AMPL12291893	35	6	chromosome_10_open_reading_frame_10
DNAJC9-AS1	AMPL37779425	0	0	DNAJC9_antisense_RNA_1
C10orf105	AMPL6823004	0	0	chromosome_10_open_reading_frame_105
C10orf107	AMPL17513415	6	7	chromosome_10_open_reading_frame_107
C10orf108	AMPL19796692	5	6	.
C10orf11	AMPL13877760	72	52	chromosome_10_open_reading_frame_11
C10orf111	AMPL16874389	3	0	chromosome_10_open_reading_frame_111
C10orf113	AMPL1852950	0	1	chromosome_10_open_reading_frame_113
C10orf116	AMPL12242923	0	1	.
C10orf118	AMPL31582112	622	631	chromosome_10_open_reading_frame_118
C10orf12	AMPL31978374	392	330	chromosome_10_open_reading_frame_12
C10orf120	AMPL36167	0	0	chromosome_10_open_reading_frame_120
TEX36	AMPL5809608	0	0	testis_expressed_36
FUOM	AMPL2164504	8	8	fucose_mutarotase
C10orf128	AMPL623908	0	0	chromosome_10_open_reading_frame_128
C10orf129	AMPL20555121	0	0	chromosome_10_open_reading_frame_129
C10orf131	AMPL5625144	2	6	chromosome_10_open_reading_frame_131
LINC00619	AMPL37885199	0	0	long_intergenic_non-protein_coding_RNA_619
C10orf137	AMPL6678503	429	458	.
SKIDA1	AMPL21745431	11	2	SKI_DACH_domain_containing_1
C10orf2	AMPL35869985	660	799	chromosome_10_open_reading_frame_2
C10orf25	AMPL4453987	0	0	chromosome_10_open_reading_frame_25
WBP1L	AMPL1989790	958	228	WW_domain_binding_protein_1-like
TBATA	AMPL34837827	0	0	thymus__brain_and_testes_associated
R3HCC1L	AMPL24735468	303	321	R3H_domain_and_coiled-coil_containing_1-like
C10orf32	AMPL3438913	740	455	chromosome_10_open_reading_frame_32
C10orf35	AMPL35609889	116	55	chromosome_10_open_reading_frame_35
CACUL1	AMPL17541674	1008	980	CDK2-associated__cullin_domain_1
C10orf47	AMPL18444773	641	518	.
C10orf53	AMPL20607772	0	0	chromosome_10_open_reading_frame_53
C10orf54	AMPL36952180	256	98	chromosome_10_open_reading_frame_54
C10orf55	AMPL4716208	41	30	chromosome_10_open_reading_frame_55
C10orf62	AMPL520585	15	2	chromosome_10_open_reading_frame_62
C10orf67	AMPL18130453	1	0	chromosome_10_open_reading_frame_67
C10orf68	AMPL15239458	0	0	.
C10orf71	AMPL3604433	1	0	chromosome_10_open_reading_frame_71
C10orf76	AMPL37420679	460	314	chromosome_10_open_reading_frame_76
PLEKHS1	AMPL21495338	0	0	pleckstrin_homology_domain_containing__family_S_member_1
C10orf82	AMPL35435060	0	0	chromosome_10_open_reading_frame_82
C10orf88	AMPL14068643	208	230	chromosome_10_open_reading_frame_88
C10orf90	AMPL4173249	0	0	chromosome_10_open_reading_frame_90
C10orf91	AMPL17286219	286	162	chromosome_10_open_reading_frame_91
C10orf95	AMPL15441033	6	0	chromosome_10_open_reading_frame_95
CCDC172	AMPL20672791	0	0	coiled-coil_domain_containing_172
C10orf99	AMPL22481869	2	0	chromosome_10_open_reading_frame_99
C11orf1	AMPL35279908	148	71	chromosome_11_open_reading_frame_1
C11orf10	AMPL26513237	2464	942	.
C11orf16	AMPL31687085	0	0	chromosome_11_open_reading_frame_16
VPS51	AMPL12486322	840	563	vacuolar_protein_sorting_51_homolog__S._cerevisiae
C11orf20	AMPL5917433	8	5	.
C11orf21	AMPL4054645	0	0	chromosome_11_open_reading_frame_21
C11orf24	AMPL36951477	1088	1205	chromosome_11_open_reading_frame_24
C11orf30	AMPL33062446	703	502	chromosome_11_open_reading_frame_30
C11orf31	AMPL17940860	1026	569	chromosome_11_open_reading_frame_31
C11orf34	AMPL6162341	0	0	.
C11orf35	AMPL18196860	324	61	chromosome_11_open_reading_frame_35
C11orf40	AMPL35639785	0	0	chromosome_11_open_reading_frame_40
KIAA1549L	AMPL12164899	129	101	KIAA1549-like
C11orf42	AMPL16842490	2	0	chromosome_11_open_reading_frame_42
C11orf45	AMPL34657894	3	0	chromosome_11_open_reading_frame_45
ARL14EP	AMPL34544055	456	217	ADP-ribosylation_factor-like_14_effector_protein
C11orf48	AMPL36719779	87	34	chromosome_11_open_reading_frame_48
C11orf49	AMPL6010187	1412	1140	chromosome_11_open_reading_frame_49
ANAPC15	AMPL24583545	975	669	anaphase_promoting_complex_subunit_15
C11orf52	AMPL18637307	3	1	chromosome_11_open_reading_frame_52
C11orf53	AMPL20760101	0	0	chromosome_11_open_reading_frame_53
C11orf54	AMPL24669551	731	400	chromosome_11_open_reading_frame_54
C11orf57	AMPL2184605	307	124	chromosome_11_open_reading_frame_57
C11orf58	AMPL24167172	5514	5880	chromosome_11_open_reading_frame_58
MSANTD2	AMPL14804425	171	164	Myb_SANT-like_DNA-binding_domain_containing_2
C11orf63	AMPL15232293	51	76	chromosome_11_open_reading_frame_63
C11orf65	AMPL34388652	4	6	chromosome_11_open_reading_frame_65
AAMDC	AMPL15121750	270	126	adipogenesis_associated__Mth938_domain_containing
C11orf70	AMPL17473837	145	113	chromosome_11_open_reading_frame_70
C11orf73	AMPL32831798	923	967	chromosome_11_open_reading_frame_73
C11orf74	AMPL34421965	253	159	chromosome_11_open_reading_frame_74
C11orf75	AMPL33549374	190	160	.
C11orf80	AMPL15072069	184	144	chromosome_11_open_reading_frame_80
C11orf82	AMPL36476890	292	546	chromosome_11_open_reading_frame_82
C11orf83	AMPL4793538	706	835	chromosome_11_open_reading_frame_83
C11orf84	AMPL34827071	584	271	chromosome_11_open_reading_frame_84
C11orf85	AMPL5776108	0	1	chromosome_11_open_reading_frame_85
C11orf86	AMPL6190407	172	128	chromosome_11_open_reading_frame_86
C11orf87	AMPL20724032	0	0	chromosome_11_open_reading_frame_87
C11orf88	AMPL22422947	0	0	chromosome_11_open_reading_frame_88
C11orf9	AMPL2179580	950	507	.
C11orf91	AMPL7078516	0	0	chromosome_11_open_reading_frame_91
C11orf92	AMPL37793356	4	0	.
C11orf93	AMPL5907651	72	18	.
C11orf94	AMPL4686148	4	4	chromosome_11_open_reading_frame_94
C11orf95	AMPL4190882	0	3	chromosome_11_open_reading_frame_95
C11orf96	AMPL3393111	1	9	chromosome_11_open_reading_frame_96
C12orf10	AMPL36312796	642	322	chromosome_12_open_reading_frame_10
CCER1	AMPL35331765	0	0	coiled-coil_glutamate-rich_protein_1
C12orf23	AMPL34964201	562	483	chromosome_12_open_reading_frame_23
FAM216A	AMPL12258037	437	399	family_with_sequence_similarity_216__member_A
METTL25	AMPL14816611	20	20	methyltransferase_like_25
C12orf29	AMPL441059	651	623	chromosome_12_open_reading_frame_29
LINC00612	AMPL38102707	0	1	long_intergenic_non-protein_coding_RNA_612
FAM222A	AMPL17573597	12	3	family_with_sequence_similarity_222__member_A
KIAA1551	AMPL32305919	388	538	KIAA1551
C12orf36	AMPL38099119	0	4	chromosome_12_open_reading_frame_36
LINC00615	AMPL37669007	0	0	long_intergenic_non-protein_coding_RNA_615
C12orf39	AMPL15429647	119	94	chromosome_12_open_reading_frame_39
C12orf4	AMPL33541975	125	218	chromosome_12_open_reading_frame_4
C12orf40	AMPL781190	0	0	chromosome_12_open_reading_frame_40
C12orf42	AMPL21568377	0	0	chromosome_12_open_reading_frame_42
C12orf43	AMPL37312651	284	159	chromosome_12_open_reading_frame_43
C12orf44	AMPL3598389	363	306	chromosome_12_open_reading_frame_44
C12orf45	AMPL34648304	299	193	chromosome_12_open_reading_frame_45
MAPKAPK5-AS1	AMPL20200871	322	291	MAPKAPK5_antisense_RNA_1
C12orf49	AMPL14634104	239	138	chromosome_12_open_reading_frame_49
C12orf5	AMPL31486965	293	504	chromosome_12_open_reading_frame_5
C12orf50	AMPL34680527	0	0	chromosome_12_open_reading_frame_50
HECTD4	AMPL2442124	487	423	HECT_domain_containing_E3_ubiquitin_protein_ligase_4
C12orf52	AMPL17925248	313	147	.
C12orf54	AMPL34774829	0	0	chromosome_12_open_reading_frame_54
C12orf56	AMPL10851570	1	0	chromosome_12_open_reading_frame_56
C12orf57	AMPL36070696	2978	2018	chromosome_12_open_reading_frame_57
TMEM52B	AMPL15682478	0	0	transmembrane_protein_52B
C12orf60	AMPL15730896	71	37	chromosome_12_open_reading_frame_60
C12orf61	AMPL17592603	20	9	chromosome_12_open_reading_frame_61
COX14	AMPL16655107	101	93	cytochrome_c_oxidase_assembly_homolog_14__S._cerevisiae
C12orf65	AMPL35248517	679	462	chromosome_12_open_reading_frame_65
C12orf66	AMPL34769859	239	155	chromosome_12_open_reading_frame_66
C12orf68	AMPL1442600	63	18	chromosome_12_open_reading_frame_68
C12orf69	AMPL901037	0	0	.
C12orf70	AMPL1671908	0	1	.
C12orf71	AMPL4119722	0	0	chromosome_12_open_reading_frame_71
C12orf73	AMPL5605117	721	342	chromosome_12_open_reading_frame_73
C12orf74	AMPL3881736	0	1	chromosome_12_open_reading_frame_74
C12orf75	AMPL2868637	2006	2552	chromosome_12_open_reading_frame_75
C12orf76	AMPL20926396	0	0	chromosome_12_open_reading_frame_76
C12orf77	AMPL5199203	0	0	chromosome_12_open_reading_frame_77
RGCC	AMPL24251646	6	26	regulator_of_cell_cycle
TEX29	AMPL34246782	3	1	testis_expressed_29
TEX26	AMPL35905926	0	0	testis_expressed_26
TEX30	AMPL34422967	252	281	testis_expressed_30
FAM216B	AMPL21885648	0	0	family_with_sequence_similarity_216__member_B
MEDAG	AMPL15912422	0	0	mesenteric_estrogen-dependent_adipogenesis
C13orf35	AMPL22102529	0	0	chromosome_13_open_reading_frame_35
C14orf1	AMPL12738690	1976	1543	chromosome_14_open_reading_frame_1
C14orf101	AMPL31975179	154	120	.
NRDE2	AMPL31588514	465	424	NRDE-2__necessary_for_RNA_interference__domain_containing
C14orf105	AMPL30979449	178	176	chromosome_14_open_reading_frame_105
TMEM251	AMPL3913766	162	113	transmembrane_protein_251
GPATCH2L	AMPL32779701	310	119	G_patch_domain_containing_2-like
C14orf119	AMPL31424659	1163	839	chromosome_14_open_reading_frame_119
DTD2	AMPL17881217	391	508	D-tyrosyl-tRNA_deacylase_2__putative
GSKIP	AMPL33743283	522	371	GSK3B_interacting_protein
VIPAS39	AMPL7276266	645	269	VPS33B_interacting_protein__apical-basolateral_polarity_regulator__spe-39_homolog
PCNXL4	AMPL35397331	1363	1745	pecanex-like_4__Drosophila
C14orf142	AMPL14971114	559	468	chromosome_14_open_reading_frame_142
L3HYPDH	AMPL34901495	475	409	L-3-hydroxyproline_dehydratase__trans-
C14orf159	AMPL5472598	11	3	chromosome_14_open_reading_frame_159
C14orf162	AMPL18793372	1	0	.
C14orf166	AMPL31039334	2246	2234	chromosome_14_open_reading_frame_166
C14orf166B	AMPL21826207	0	0	chromosome_14_open_reading_frame_166B
C14orf169	AMPL14748099	115	79	chromosome_14_open_reading_frame_169
TMEM253	AMPL7371905	11	5	transmembrane_protein_253
C14orf177	AMPL21496078	0	0	chromosome_14_open_reading_frame_177
C14orf178	AMPL18386239	47	12	chromosome_14_open_reading_frame_178
C14orf180	AMPL2613251	0	0	chromosome_14_open_reading_frame_180
C14orf182	AMPL614879	0	1	chromosome_14_open_reading_frame_182
C14orf183	AMPL975675	0	0	chromosome_14_open_reading_frame_183
C14orf2	AMPL30072459	7076	4659	chromosome_14_open_reading_frame_2
NOP9	AMPL15742895	330	139	NOP9_nucleolar_protein
C14orf23	AMPL19536735	0	0	chromosome_14_open_reading_frame_23
C14orf28	AMPL423724	101	63	chromosome_14_open_reading_frame_28
C14orf37	AMPL3855528	6	4	chromosome_14_open_reading_frame_37
CCDC175	AMPL9102697	1	0	coiled-coil_domain_containing_175
C14orf39	AMPL16822717	0	0	chromosome_14_open_reading_frame_39
ELMSAN1	AMPL1297445	489	315	ELM2_and_Myb_SANT-like_domain_containing_1
CCDC176	AMPL15330156	51	45	coiled-coil_domain_containing_176
SYNE3	AMPL36071249	5	11	spectrin_repeat_containing__nuclear_envelope_family_member_3
C14orf79	AMPL17680861	87	69	chromosome_14_open_reading_frame_79
C14orf80	AMPL6068909	218	170	chromosome_14_open_reading_frame_80
C14orf93	AMPL3470440	337	126	chromosome_14_open_reading_frame_93
FAM219B	AMPL30658525	456	137	family_with_sequence_similarity_219__member_B
C15orf23	AMPL17915508	919	821	.
EMC7	AMPL33064189	2376	1943	ER_membrane_protein_complex_subunit_7
C15orf26	AMPL17921508	0	2	chromosome_15_open_reading_frame_26
C15orf27	AMPL34398070	1	0	chromosome_15_open_reading_frame_27
KATNBL1	AMPL15555362	448	477	katanin_p80_subunit_B-like_1
C15orf32	AMPL17328577	0	0	chromosome_15_open_reading_frame_32
FAM227B	AMPL34338744	82	58	family_with_sequence_similarity_227__member_B
HEXA-AS1	AMPL19101962	0	0	HEXA_antisense_RNA_1
C15orf37	AMPL19339468	17	11	chromosome_15_open_reading_frame_37
C15orf39	AMPL33330568	397	117	chromosome_15_open_reading_frame_39
C15orf40	AMPL9886722	417	362	chromosome_15_open_reading_frame_40
C15orf41	AMPL3306085	159	124	chromosome_15_open_reading_frame_41
TICRR	AMPL34545750	523	354	TOPBP1-interacting_checkpoint_and_replication_regulator
C15orf43	AMPL34601882	0	0	chromosome_15_open_reading_frame_43
VWA9	AMPL8033806	49	42	von_Willebrand_factor_A_domain_containing_9
C15orf48	AMPL14750691	231	113	chromosome_15_open_reading_frame_48
LINC00593	AMPL19302775	1	0	long_intergenic_non-protein_coding_RNA_593
C15orf52	AMPL21700121	78	23	chromosome_15_open_reading_frame_52
C15orf53	AMPL21797128	0	0	chromosome_15_open_reading_frame_53
C15orf54	AMPL21750327	0	0	chromosome_15_open_reading_frame_54
C15orf55	AMPL16302996	0	0	.
C15orf57	AMPL4937338	290	268	chromosome_15_open_reading_frame_57
GDPGP1	AMPL978428	290	123	GDP-D-glucose_phosphorylase_1
C15orf59	AMPL1502730	29	8	chromosome_15_open_reading_frame_59
C15orf60	AMPL5000972	0	0	chromosome_15_open_reading_frame_60
C15orf61	AMPL3728637	441	323	chromosome_15_open_reading_frame_61
C15orf62	AMPL6247275	24	5	chromosome_15_open_reading_frame_62
HYPK	AMPL33042996	1528	2160	huntingtin_interacting_protein_K
C16orf11	AMPL34977336	0	0	chromosome_16_open_reading_frame_11
C16orf13	AMPL14332253	622	144	chromosome_16_open_reading_frame_13
C16orf3	AMPL8038786	31	10	chromosome_16_open_reading_frame_3
TSR3	AMPL3705671	879	588	TSR3__20S_rRNA_accumulation__homolog__S._cerevisiae
C16orf45	AMPL16969674	861	440	chromosome_16_open_reading_frame_45
C16orf46	AMPL36000178	11	7	chromosome_16_open_reading_frame_46
ENKD1	AMPL15465242	48	16	enkurin_domain_containing_1
C16orf5	AMPL25535845	177	106	.
C16orf52	AMPL10186880	720	325	chromosome_16_open_reading_frame_52
PAGR1	AMPL35357250	681	329	PAXIP1_associated_glutamate-rich_protein_1
C16orf54	AMPL18469422	0	0	chromosome_16_open_reading_frame_54
C16orf55	AMPL17433642	132	88	.
USB1	AMPL14439191	824	380	U6_snRNA_biogenesis_1
C16orf58	AMPL36173102	561	199	chromosome_16_open_reading_frame_58
C16orf59	AMPL14620887	202	140	chromosome_16_open_reading_frame_59
CMC2	AMPL33873279	1409	1093	C-x_9_-C_motif_containing_2
C16orf62	AMPL31018550	1162	654	chromosome_16_open_reading_frame_62
VPS9D1	AMPL27769217	107	50	VPS9_domain_containing_1
C16orf70	AMPL14785714	1289	1221	chromosome_16_open_reading_frame_70
C16orf71	AMPL34270166	3	1	chromosome_16_open_reading_frame_71
C16orf72	AMPL24582022	929	942	chromosome_16_open_reading_frame_72
MEIOB	AMPL6985818	27	15	meiosis_specific_with_OB_domains
C16orf74	AMPL22056364	220	212	chromosome_16_open_reading_frame_74
C16orf78	AMPL35003553	1	0	chromosome_16_open_reading_frame_78
BRICD5	AMPL22302345	146	30	BRICHOS_domain_containing_5
C16orf80	AMPL13683459	314	213	chromosome_16_open_reading_frame_80
C16orf82	AMPL2692530	0	0	chromosome_16_open_reading_frame_82
C16orf86	AMPL321233	4	1	chromosome_16_open_reading_frame_86
C16orf87	AMPL5745110	340	304	chromosome_16_open_reading_frame_87
C16orf88	AMPL507281	503	453	.
C16orf89	AMPL34683993	2	0	chromosome_16_open_reading_frame_89
C16orf90	AMPL2190137	0	0	chromosome_16_open_reading_frame_90
C16orf91	AMPL719837	0	0	chromosome_16_open_reading_frame_91
C16orf92	AMPL4440918	0	0	chromosome_16_open_reading_frame_92
C16orf93	AMPL701293	22	5	chromosome_16_open_reading_frame_93
C16orf95	AMPL11116564	27	10	chromosome_16_open_reading_frame_95
C16orf96	AMPL4928426	2	0	chromosome_16_open_reading_frame_96
C17orf100	AMPL4306218	163	69	chromosome_17_open_reading_frame_100
OGFOD3	AMPL14862816	238	70	2-oxoglutarate_and_iron-dependent_oxygenase_domain_containing_3
C17orf102	AMPL22256383	0	0	chromosome_17_open_reading_frame_102
C17orf103	AMPL18351840	48	6	chromosome_17_open_reading_frame_103
C17orf104	AMPL2069413	154	203	chromosome_17_open_reading_frame_104
C17orf105	AMPL4215882	0	2	chromosome_17_open_reading_frame_105
C17orf107	AMPL3198007	15	7	chromosome_17_open_reading_frame_107
LYRM9	AMPL4281350	221	56	LYR_motif_containing_9
SMIM5	AMPL11054673	2	1	small_integral_membrane_protein_5
SMIM6	AMPL10210478	68	40	small_integral_membrane_protein_6
HID1	AMPL15428120	423	104	HID1_domain_containing
GID4	AMPL35832122	320	195	GID_complex_subunit_4
SPATA32	AMPL35817835	0	0	spermatogenesis_associated_32
C17orf47	AMPL3091078	2	0	chromosome_17_open_reading_frame_47
ADPRM	AMPL30668447	159	92	ADP-ribose_CDP-alcohol_diphosphatase__manganese-dependent
C17orf49	AMPL4804622	2851	1838	chromosome_17_open_reading_frame_49
C17orf50	AMPL35398175	0	0	chromosome_17_open_reading_frame_50
C17orf51	AMPL1370028	198	96	chromosome_17_open_reading_frame_51
C17orf53	AMPL36491065	178	94	chromosome_17_open_reading_frame_53
ENTHD2	AMPL35273196	641	232	ENTH_domain_containing_2
EFCAB13	AMPL34348060	0	0	EF-hand_calcium_binding_domain_13
C17orf58	AMPL15966669	389	213	chromosome_17_open_reading_frame_58
C17orf59	AMPL32688024	173	53	chromosome_17_open_reading_frame_59
C17orf61	AMPL35673540	1826	895	.
C17orf62	AMPL7270988	647	182	chromosome_17_open_reading_frame_62
FAM222B	AMPL2647267	809	304	family_with_sequence_similarity_222__member_B
C17orf64	AMPL15623864	0	0	chromosome_17_open_reading_frame_64
C17orf66	AMPL35027520	0	0	chromosome_17_open_reading_frame_66
C17orf67	AMPL6138306	50	28	chromosome_17_open_reading_frame_67
CRHR1-IT1	AMPL19510862	10	5	CRHR1_intronic_transcript_1__non-protein_coding
C17orf70	AMPL14179463	318	149	chromosome_17_open_reading_frame_70
C17orf72	AMPL7462165	4	0	chromosome_17_open_reading_frame_72
C17orf74	AMPL16724651	0	0	chromosome_17_open_reading_frame_74
C17orf75	AMPL35196099	547	289	chromosome_17_open_reading_frame_75
C17orf77	AMPL36454560	1	0	chromosome_17_open_reading_frame_77
C17orf78	AMPL15923845	0	0	chromosome_17_open_reading_frame_78
C17orf79	AMPL32282857	693	473	.
C17orf80	AMPL31964708	313	213	chromosome_17_open_reading_frame_80
ELP5	AMPL22375505	1019	576	elongator_acetyltransferase_complex_subunit_5
C17orf82	AMPL22206433	2	1	chromosome_17_open_reading_frame_82
C17orf85	AMPL1809425	1756	2222	chromosome_17_open_reading_frame_85
C17orf89	AMPL3787401	545	728	chromosome_17_open_reading_frame_89
OXLD1	AMPL4860696	284	162	oxidoreductase-like_domain_containing_1
C17orf96	AMPL5487603	113	60	chromosome_17_open_reading_frame_96
C17orf97	AMPL976951	182	60	chromosome_17_open_reading_frame_97
C17orf98	AMPL6012964	0	0	chromosome_17_open_reading_frame_98
C17orf99	AMPL9722886	0	0	chromosome_17_open_reading_frame_99
LDLRAD4	AMPL15695236	3	1	low_density_lipoprotein_receptor_class_A_domain_containing_4
C18orf21	AMPL14708942	427	400	chromosome_18_open_reading_frame_21
C18orf25	AMPL34197282	65	79	chromosome_18_open_reading_frame_25
DYNAP	AMPL18008595	0	0	dynactin_associated_protein
C18orf32	AMPL10094611	207	137	chromosome_18_open_reading_frame_32
CCDC178	AMPL4022325	0	0	coiled-coil_domain_containing_178
C18orf42	AMPL4320844	0	0	chromosome_18_open_reading_frame_42
C18orf54	AMPL16423240	35	55	chromosome_18_open_reading_frame_54
C18orf56	AMPL2938323	195	123	chromosome_18_open_reading_frame_56
C18orf62	AMPL2508292	0	0	.
C18orf63	AMPL6700518	1	0	chromosome_18_open_reading_frame_63
C18orf8	AMPL13786862	171	121	chromosome_18_open_reading_frame_8
C19orf10	AMPL32152268	359	305	chromosome_19_open_reading_frame_10
C19orf12	AMPL1050970	30	14	chromosome_19_open_reading_frame_12
C19orf18	AMPL35699110	0	0	chromosome_19_open_reading_frame_18
C19orf21	AMPL16326415	1653	773	.
C19orf24	AMPL34032844	669	515	chromosome_19_open_reading_frame_24
C19orf25	AMPL34853005	79	55	chromosome_19_open_reading_frame_25
C19orf26	AMPL34333315	13	7	chromosome_19_open_reading_frame_26
CACTIN	AMPL1992247	390	216	cactin__spliceosome_C_complex_subunit
C19orf33	AMPL17352989	604	347	chromosome_19_open_reading_frame_33
C19orf35	AMPL22334960	0	0	chromosome_19_open_reading_frame_35
C19orf38	AMPL4817753	1	0	chromosome_19_open_reading_frame_38
C19orf40	AMPL35511287	200	182	chromosome_19_open_reading_frame_40
SMIM7	AMPL37306317	808	848	small_integral_membrane_protein_7
C19orf43	AMPL36367824	5256	3152	chromosome_19_open_reading_frame_43
C19orf44	AMPL15187042	47	17	chromosome_19_open_reading_frame_44
C19orf45	AMPL20872799	10	4	chromosome_19_open_reading_frame_45
SYNE4	AMPL4442693	11	1	spectrin_repeat_containing__nuclear_envelope_family_member_4
C19orf48	AMPL20855169	19	5	chromosome_19_open_reading_frame_48
DNAAF3	AMPL15979758	293	94	dynein__axonemal__assembly_factor_3
C19orf53	AMPL24426008	1055	700	chromosome_19_open_reading_frame_53
C19orf54	AMPL21235581	306	100	chromosome_19_open_reading_frame_54
C19orf55	AMPL4159738	389	157	chromosome_19_open_reading_frame_55
C19orf57	AMPL36990612	0	1	chromosome_19_open_reading_frame_57
C19orf59	AMPL16506412	0	0	chromosome_19_open_reading_frame_59
C19orf6	AMPL185592	1973	824	.
C19orf60	AMPL4048571	116	64	chromosome_19_open_reading_frame_60
EMC10	AMPL21704861	2524	1467	ER_membrane_protein_complex_subunit_10
C19orf66	AMPL32744907	317	164	chromosome_19_open_reading_frame_66
C19orf69	AMPL4537603	32	6	chromosome_19_open_reading_frame_69
C19orf70	AMPL22204635	39	25	chromosome_19_open_reading_frame_70
C19orf71	AMPL2545266	6	0	chromosome_19_open_reading_frame_71
C19orf73	AMPL32098098	58	18	chromosome_19_open_reading_frame_73
SIGLECL1	AMPL16314405	0	0	SIGLEC_family_like_1
ADM5	AMPL3747823	66	25	adrenomedullin_5__putative
C19orf77	AMPL6304729	2	0	chromosome_19_open_reading_frame_77
PET100	AMPL7643333	540	357	PET100_homolog__S._cerevisiae
C19orf80	AMPL30810214	3	1	chromosome_19_open_reading_frame_80
C19orf81	AMPL8863367	0	0	chromosome_19_open_reading_frame_81
C1D	AMPL27880744	475	397	C1D_nuclear_receptor_corepressor
C1GALT1	AMPL30915457	750	837	core_1_synthase__glycoprotein-N-acetylgalactosamine_3-beta-galactosyltransferase__1
C1GALT1C1	AMPL986005	1060	717	C1GALT1-specific_chaperone_1
C1orf100	AMPL2937258	0	0	chromosome_1_open_reading_frame_100
C1orf101	AMPL4987671	1	2	chromosome_1_open_reading_frame_101
C1orf105	AMPL35655461	0	1	chromosome_1_open_reading_frame_105
C1orf106	AMPL32993917	633	274	chromosome_1_open_reading_frame_106
C1orf109	AMPL32662283	527	469	chromosome_1_open_reading_frame_109
C1orf110	AMPL18151582	0	0	chromosome_1_open_reading_frame_110
C1orf111	AMPL20711934	0	0	chromosome_1_open_reading_frame_111
C1orf112	AMPL30725850	303	398	chromosome_1_open_reading_frame_112
C1orf114	AMPL35546250	0	4	.
C1orf115	AMPL14529508	138	63	chromosome_1_open_reading_frame_115
C1orf116	AMPL35829639	31	36	chromosome_1_open_reading_frame_116
C1orf122	AMPL21571575	108	73	chromosome_1_open_reading_frame_122
C1orf123	AMPL31425371	1127	738	chromosome_1_open_reading_frame_123
SPRTN	AMPL13876935	523	693	SprT-like_N-terminal_domain
C1orf126	AMPL18843332	26	14	.
C1orf127	AMPL10540151	0	0	chromosome_1_open_reading_frame_127
C1orf129	AMPL6880420	0	0	.
NCMAP	AMPL986082	13	3	noncompact_myelin_associated_protein
C1orf131	AMPL35817688	361	400	chromosome_1_open_reading_frame_131
SERTAD4-AS1	AMPL20376728	17	20	SERTAD4_antisense_RNA_1
AUNIP	AMPL37370639	316	324	aurora_kinase_A_and_ninein_interacting_protein
C1orf140	AMPL20563654	0	0	.
C1orf141	AMPL1405980	0	0	chromosome_1_open_reading_frame_141
SZRD1	AMPL5033277	2451	1567	SUZ_RNA_binding_domain_containing_1
C1orf146	AMPL1434012	0	0	chromosome_1_open_reading_frame_146
GCSAML	AMPL35835700	0	0	germinal_center-associated__signaling_and_motility-like
C1orf158	AMPL36129587	0	0	chromosome_1_open_reading_frame_158
C1orf159	AMPL31081201	234	120	chromosome_1_open_reading_frame_159
C1orf162	AMPL18094126	1	0	chromosome_1_open_reading_frame_162
C1orf168	AMPL2386764	0	0	chromosome_1_open_reading_frame_168
C1orf170	AMPL19226008	2	0	chromosome_1_open_reading_frame_170
C1orf172	AMPL36123244	0	0	chromosome_1_open_reading_frame_172
C1orf173	AMPL3486051	0	0	chromosome_1_open_reading_frame_173
C1orf174	AMPL22315688	440	497	chromosome_1_open_reading_frame_174
C1orf177	AMPL2434159	0	0	chromosome_1_open_reading_frame_177
TSACC	AMPL35753826	11	7	TSSK6_activating_co-chaperone
C1orf185	AMPL4819521	0	0	chromosome_1_open_reading_frame_185
C1orf186	AMPL133572	0	1	chromosome_1_open_reading_frame_186
DRAXIN	AMPL21568493	0	1	dorsal_inhibitory_axon_guidance_protein
C1orf189	AMPL1108385	3	0	chromosome_1_open_reading_frame_189
LURAP1	AMPL706133	0	0	leucine_rich_adaptor_protein_1
C1orf192	AMPL706742	3	1	chromosome_1_open_reading_frame_192
C1orf194	AMPL1808642	1	0	chromosome_1_open_reading_frame_194
C1orf198	AMPL16421093	737	480	chromosome_1_open_reading_frame_198
C1orf200	AMPL19496998	0	0	chromosome_1_open_reading_frame_200
STPG1	AMPL10286282	416	369	sperm-tail_PG-rich_repeat_containing_1
C1orf21	AMPL14284754	144	106	chromosome_1_open_reading_frame_21
C1orf210	AMPL21640311	1	0	chromosome_1_open_reading_frame_210
C1orf220	AMPL38084896	11	2	chromosome_1_open_reading_frame_220
C1orf226	AMPL3083701	15	17	chromosome_1_open_reading_frame_226
C1orf227	AMPL493571	0	2	chromosome_1_open_reading_frame_227
C1orf228	AMPL3555041	47	24	chromosome_1_open_reading_frame_228
C1orf229	AMPL22262957	3	0	chromosome_1_open_reading_frame_229
C1orf27	AMPL33701614	112	144	chromosome_1_open_reading_frame_27
COA6	AMPL810360	86	58	cytochrome_c_oxidase_assembly_factor_6_homolog__S._cerevisiae
C1orf35	AMPL36600031	213	157	chromosome_1_open_reading_frame_35
[truncated: 18,804 more rows]
